# Alzheimer's Disease Related Markers, Cellular Toxicity and Behavioral Deficits Induced Six Weeks after Oligomeric Amyloid- $\beta$ Peptide Injection in Rats

Charleine Zussy<sup>1,2,3</sup>, Anthony Brureau<sup>1,2,3</sup>, Emeline Keller<sup>1,2,3</sup>, Stéphane Marchal<sup>1,2,3</sup>, Claire Blayo<sup>1,2,3</sup>, Brice Delair<sup>1,2,3</sup>, Guy Ixart<sup>1,2,3</sup>, Tanguy Maurice<sup>1,2,3</sup>, Laurent Givalois<sup>1,2,3\*</sup>

**1** Molecular Mechanisms in Neurodegenerative Dementia Laboratory, Inserm U710, Montpellier, France, **2** University of Montpellier 2, Montpellier, France, **3** EPHE, Paris, France

## Abstract

Alzheimer's disease (AD) is a neurodegenerative pathology associated with aging characterized by the presence of senile plaques and neurofibrillary tangles that finally result in synaptic and neuronal loss. The major component of senile plaques is an amyloid- $\beta$  protein (A $\beta$ ). Recently, we characterized the effects of a single intracerebroventricular (icv) injection of A $\beta$  fragment (25–35) oligomers ( $\alpha$ A $\beta_{25-35}$ ) for up to 3 weeks in rats and established a clear parallel with numerous relevant signs of AD. To clarify the long-term effects of  $\alpha$ A $\beta_{25-35}$  and its potential role in the pathogenesis of AD, we determined its physiological, behavioral, biochemical and morphological impacts 6 weeks after injection in rats.  $\alpha$ A $\beta_{25-35}$  was still present in the brain after 6 weeks.  $\alpha$ A $\beta_{25-35}$  injection did not affect general activity and temperature rhythms after 6 weeks, but decreased body weight, induced short- and long-term memory impairments, increased corticosterone plasma levels, brain oxidative (lipid peroxidation), mitochondrial (caspase-9 levels) and reticulum stress (caspase-12 levels), astroglial and microglial activation. It provoked cholinergic neuron loss and decreased brain-derived neurotrophic factor levels. It induced cell loss in the hippocampic CA subdivisions and decreased hippocampic neurogenesis. Moreover,  $\alpha$ A $\beta_{25-35}$  injection resulted in increased APP expression, A $\beta_{1-42}$  generation, and increased Tau phosphorylation. In conclusion, this *in vivo* study evidenced that the soluble oligomeric forms of short fragments of A $\beta$ , endogenously identified in AD patient brains, not only provoked long-lasting pathological alterations comparable to the human disease, but may also directly contribute to the progressive increase in amyloid load and Tau pathology, involved in the AD physiopathology.

**Citation:** Zussy C, Brureau A, Keller E, Marchal S, Blayo C, et al. (2013) Alzheimer's Disease Related Markers, Cellular Toxicity and Behavioral Deficits Induced Six Weeks after Oligomeric Amyloid- $\beta$  Peptide Injection in Rats. PLoS ONE 8(1): e53117. doi:10.1371/journal.pone.0053117

**Editor:** Stephen D. Ginsberg, Nathan Kline Institute and New York University School of Medicine, United States of America

**Received:** May 24, 2012; **Accepted:** November 28, 2012; **Published:** January 2, 2013

**Copyright:** © 2013 Zussy et al. This is an open-access article distributed under the terms of the Creative Commons Attribution License, which permits unrestricted use, distribution, and reproduction in any medium, provided the original author and source are credited.

**Funding:** This work was supported by annual INSERM funding. The funders had no role in study design, data collection and analysis, decision to publish, or preparation of the manuscript.

**Competing Interests:** The authors have declared that no competing interests exist.

\* E-mail: lgivalois@univ-montp2.fr

## Introduction

Alzheimer's disease (AD) is the most common cause of dementia in the elderly and is characterized by a progressive impairment in cognitive functions, resulting from synapse and nerve cell destruction in the brain. AD symptoms include memory loss, alteration of the individual's personality and failure to communicate or perform routine tasks. The histopathological hallmarks of AD include the presence of extracellular senile plaques, intracellular neurofibrillary tangles (NFT), reduction and dysfunction of synapses, neuronal death and reduction in overall brain volume. Senile plaques are composed of insoluble extracellular aggregates consisting mainly of amyloid- $\beta$  (A $\beta$ ) peptides, which are generated by enzymatic cleavages of the amyloid precursor protein (APP), while NFT are the result of hyper- and abnormal phosphorylation of the microtubule-stabilizing protein Tau [1,2].

There is no doubt that progressive A $\beta$  accumulation contributes to AD. A correlation between the total amount of A $\beta$  in human brain and cognitive decline indicates that the amount of A $\beta$ , but not necessarily plaque formation, is important for AD progression [3,4]. Transgenic APP mice demonstrate cognitive decline before

plaque formation [5], and soluble oligomers can inhibit cognitive function [6] and long-term potentiation [7,8]. In fact, it is possible that extracellular amyloid deposits are only one aspect of the larger pathological cascade and an indirect consequence of possible protective responses intended to sequester toxic soluble A $\beta$  oligomers [4]. The degree of dementia in AD correlates better with A $\beta$  assayed biochemically, than with the histologically determined number of plaque. The concentration of soluble A $\beta$  species, which cannot be detected through an immunohistochemical analysis, appears to be more closely correlated with cognitive deficits [3,4]. In fact, A $\beta$  deposits may not even carry the most aggressive toxicity, but instead represent a reserve of toxicity from where toxic oligomeric fragments could be released [9–11].

The soluble A $\beta$  oligomers observed in AD patients contain A $\beta$  in its most predominant sequences: A $\beta_{1-40}$  or A $\beta_{1-42}$  [3,11]. Nevertheless, they also contain peptides with shorter sequences such as N-truncated amyloid- $\beta$  oligomers [12,13]: A $\beta_{25-35}$  or A $\beta_{25-35/40}$  [14–16]. A $\beta_{25-35}$  (GSNKGAIIGLM) can be produced in AD patients by enzymatic cleavage of A $\beta_{1-40}$  [14,15]. This A $\beta$  peptide includes extracellular and transmembrane residues that have been reported to represent a biologically active region of A $\beta$

[17–19] and to contain the highly hydrophobic region forming stable aggregations [18]. Interest in this undecapeptide, which itself shows a  $\beta$ -sheet structure [18,20], has grown over the last decade, mainly because it induces neurite atrophy, neuronal cell death, synaptic loss, as well as synaptic plasticity and memory deficits in a similar way to  $A\beta_{1-40}$  and  $A\beta_{1-42}$  [21], but with better solubility and efficiency [22,23].

Most studies in rodents have examined the effects of  $A\beta_{25-35}$  1, 2 and 3 weeks after its icv injection [20,24–35]. Only one study continued the investigation up to 6 months after icv injection of  $A\beta_{25-35}$  and found long-lasting memory deficits [34].

Therefore, to clarify the long-term effects of a single icv injection of  $A\beta_{25-35}$  oligomers (o $A\beta_{25-35}$ ) and to evaluate a potential impact of such short  $A\beta$  fragment in the progression of AD, we conducted a study to determine its behavioral, physiological, biochemical and morphological impacts in healthy adult male rats, 6 weeks after a single icv injection, including changes in APP processing,  $A\beta_{1-42}$  generation and Tau hyperphosphorylation.

## Methods

### Animals

Adult male Sprague-Dawley rats (Depré, France) weighing 280–300 g at the beginning of the experiments were housed for 1 week before experiments under standard laboratory conditions (12 h/12 h light/dark cycle with lights on at 7:00 AM;  $21 \pm 1^\circ\text{C}$ , food and water *ad libitum*). The animals were treated in accordance with the European Community Council Directive (EEC/86/609). The Animal Welfare Committee at the University of Montpellier 2 approved all protocols and all efforts were made to minimize the number of animals used and potential pain and distress. All surgery was performed under Ketamine/Xylazine mixture, and all efforts were made to minimize suffering. All experiments were performed in conscious rats between 9:00 AM and 2:00 PM, i.e. during the diurnal trough of the circadian rhythm.

### Amyloid- $\beta$ Peptide

$A\beta_{25-35}$  and scrambled  $A\beta_{25-35}$  peptide (NeoMPS, France) were dissolved in sterile bidistilled water at a concentration of 1  $\mu\text{g}/\mu\text{l}$  (soluble form) and stored at  $-20^\circ\text{C}$ .  $A\beta_{25-35}$  and scrambled peptides were aggregated by *in vitro* incubation at  $37^\circ\text{C}$  for 4 days [26], to obtain a solution of  $A\beta_{25-35}$  oligomers (o $A\beta_{25-35}$ ).

To evaluate the size of particles induced after the 4 days incubation at  $37^\circ\text{C}$ , different fractions (detailed in figure 1) were evaluated by photon correlation spectroscopy (PCS) using a Nanosizer (Zetasizer Nano Series ZS, Malvern Instruments, UK) with a laser light wavelength at 632.8 nm and a scattering angle of 173 degrees. The particle size (nm) was measured at  $25^\circ\text{C}$  using disposable microcuvettes (Malvern Instruments). The correlation times were defined on 10 s per run and a total of 13 runs was made per measurement. Before measurements, each sample was diluted if necessary in water to avoid multiple diffusion phenomena during PCS measurements. Results were analyzed using a Zetasizer software 6.01, experimental data were assessed by NNLS algorithm. For this calculation, the dispersant viscosity was taken as 0.89 mPa at  $25^\circ\text{C}$  and the refractive index as 1.33. Size distributions were expressed as size frequency distribution (%) in function of particles size (nm). As control, monomeric form of  $A\beta_{25-35}$  peptide was obtained by dilution in hexafluoroisopropanol (HFIP, Sigma-Aldrich, France).

### Experimental Procedures

Animals were divided into three groups. One group was left undisturbed (control rats), a second group received an icv injection

of incubated scrambled peptide (10  $\mu\text{g}/\text{rat}$ ) and a third group received an icv injection of o $A\beta_{25-35}$  peptide (10  $\mu\text{g}/\text{rat}$ ) [25]. For icv injection through a Hamilton syringe (VWR, France), the animals were anesthetized with an intramuscular injection of 0.2 ml of a mixture of Ketamine hydrochloride (80 mg/kg b.w.) and Xylazine (10 mg/kg b.w.). They were then stereotaxically injected directly into the lateral ventricles at coordinates (AP:  $-1$  mm, L:  $\pm 1.5$  mm, and DV:  $-3.5$  mm) according to Paxinos and Watson [35].

### Locomotor Activity and Body Temperature Variations

The day of the icv injection and during the same anesthetic session, a single telemetric transmitter (PhysioTel, TA 10TA-F40; DSI, USA) was implanted intra-peritoneally. The corresponding receiver (RA1010; DSI) was fixed under the animal's cage and connected via a BMC100 consolidation matrix (DSI) to a Dataquest III computerized data analyzer (DSI). The animals were then recorded during the 6<sup>th</sup> week following peptide injection and telemetric data were analyzed. This system allows measurement of continuous locomotor activity and body temperature variations, as previously reported [20].

### Spatial Short-term Memory (Delayed Alternation in the T-maze)

As previously detailed [20,36], delayed alternation was tested in the T-maze and the results were expressed as ratio of the time spent in the initially closed novel arm over the time spent in the previous arm and as a ratio of the number of entries into the novel arm over the familiar one.

### Spatial Long-term Memory (Place Learning in the Water-maze)

As previously reported [20,25], spatial reference memory was tested using a place learning procedure in the water-maze. Training consisted of three swims per day for 5 days. Each rat was allowed a 90 s swim to find the platform and was left for a further 30 s on the platform. The median latency was determined for each training session. A probe test was performed 4 h after the last training session. The platform was removed and each rat was allowed a free 60 s swim. The percentage of time spent in the training quadrant was determined by videotracking (Viewpoint, France).

### Endocrine Stress

Blood samples were collected after killing the rats by decapitation, as previously reported [37]. Plasma corticosterone (CORT) was assayed with a radioimmunoassay kit (Biotrak, GE-Healthcare, France) in 50  $\mu\text{l}$  plasma sample diluted (1:5) with the assay buffer. The intra- and inter-assay coefficients of variation were 5% and 7%, respectively. The assay sensitivity was 0.6 ng/ml.

### Oxidative Stress

As previously described [20,28], quantification of lipid peroxidation in tissue extracts was based on Fe(III)xylene orange complex formation according to the Hermes-Lima method [38].

### Specific Markers (GFAP, Iba1, VACHt, PSA-NCAM, Caspase-9, -12 and -3)

Rats were sacrificed by decapitation and structures of interest were weighed, immediately frozen in liquid nitrogen and stored at  $-20^\circ\text{C}$ . Tissues were sonicated with a VibraCell (Sonics & Materials, USA) in 2% SDS. Homogenates were then boiled (5 min) and centrifuged for 30 min at 14000 g (for GFAP, pro-

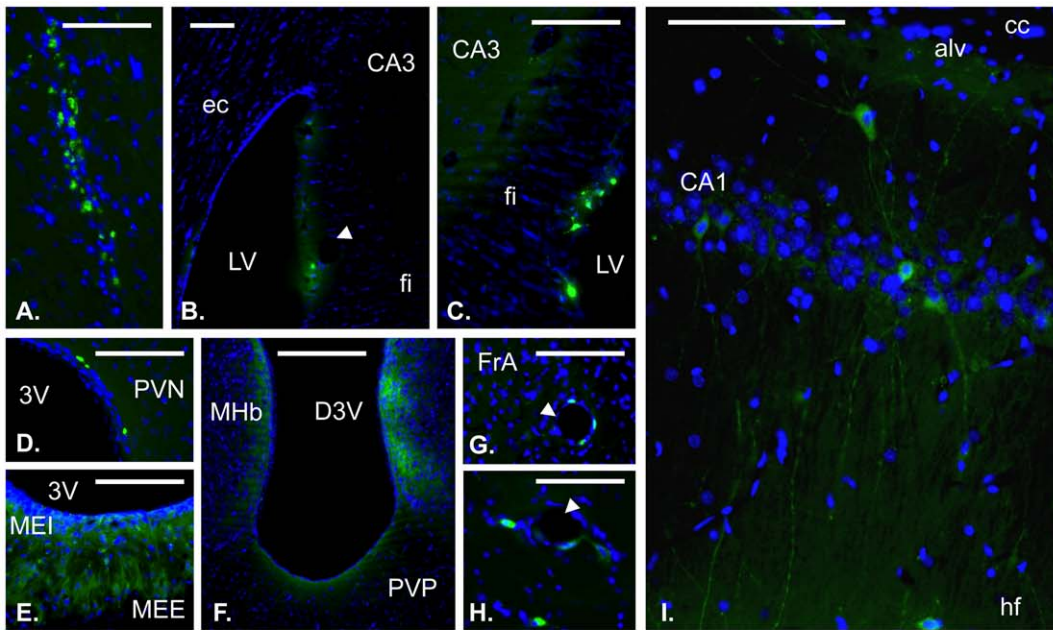

**J.**

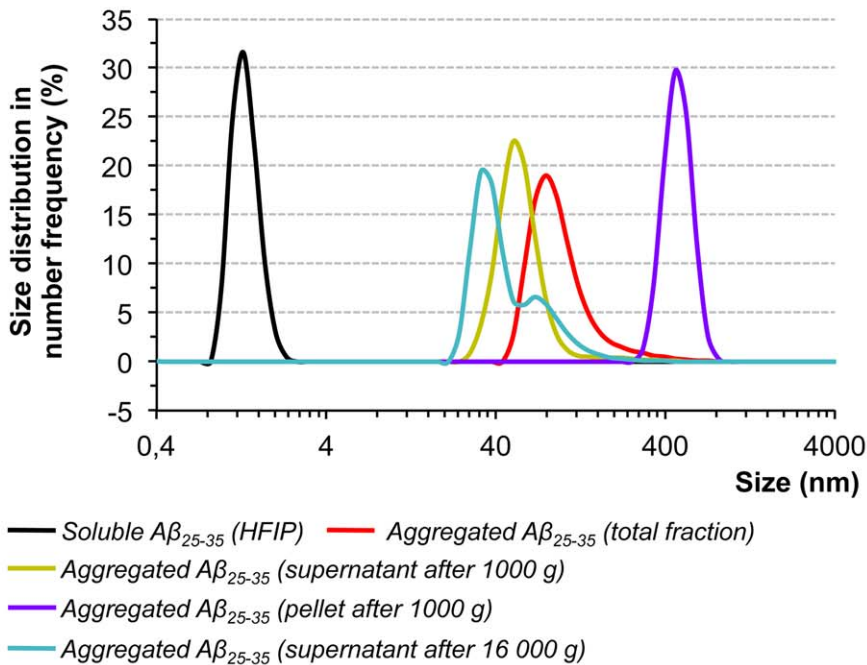

**Figure 1. Brain localization of  $A\beta_{25-35}$  and particle characterization of  $A\beta_{25-35}$  solutions A-I.** Localization within brain structures of  $oA\beta_{25-35}$ -HLF, determined 6 weeks after its icv injection (10  $\mu$ g/rat).  $oA\beta_{25-35}$ -HLF was visualized in green, while the nucleus was counterstained with DAPI (blue labeling). Abbreviations: 3V: third ventricle; alv: alveus of the hippocampus; CA1: field CA1 of hippocampus; CA3: field CA3 of the hippocampus; cc: corpus callosum; D3V: dorsal third ventricle; ec: external capsule; fi: fimbria of the hippocampus; FrA: frontal association cortex; hf: hippocampal fissure; LV: lateral ventricle; MEE: median eminence, external part; MEI: median eminence, internal part; MHb: medial habenular nucleus; PVN: paraventricular hypothalamic nucleus; PVP: paraventricular thalamic nucleus, posterior part. Arrowhead: blood vessel. Scale bar = 100  $\mu$ m. **J.** Particle size distribution of the different fractions of  $A\beta_{25-35}$  solution (1  $\mu$ g/ $\mu$ l) was determined by PCS at 25°C. Samples were prepared as described in the materials and methods section. Black curve:  $A\beta_{25-35}$  peptide dissolved in hexafluoroisopropanol (HFIP); Red curve: solution of aggregated  $A\beta_{25-35}$  peptide; Green curve: supernatant of aggregated  $A\beta_{25-35}$  peptide centrifuged at 1 000 g; Purple curve: re-suspended pellet of aggregated  $A\beta_{25-35}$  peptide obtained after centrifugation at 1 000 g; Blue curve: supernatant of aggregated  $A\beta_{25-35}$  peptide centrifuged at 16 000 g. Data were analyzed using a Zetasizer software 6.01 and expressed as size frequency distribution (%) in function of particles size (nm). doi:10.1371/journal.pone.0053117.g001

**A.**

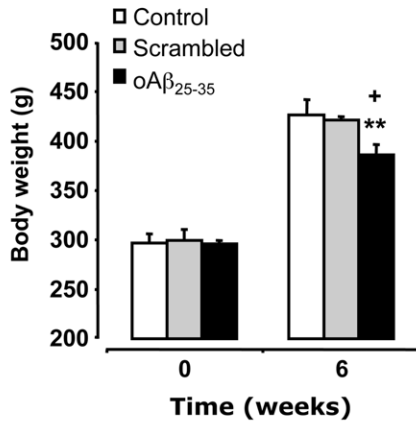

**B.**

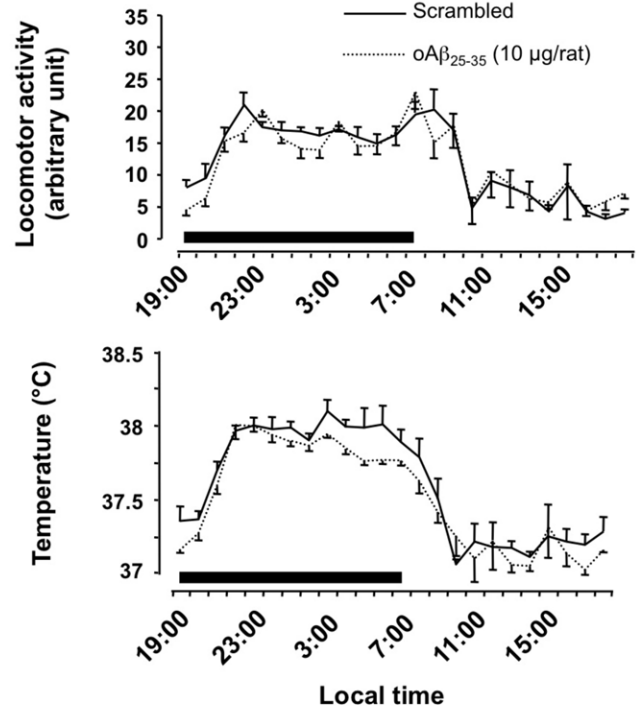

**C.**

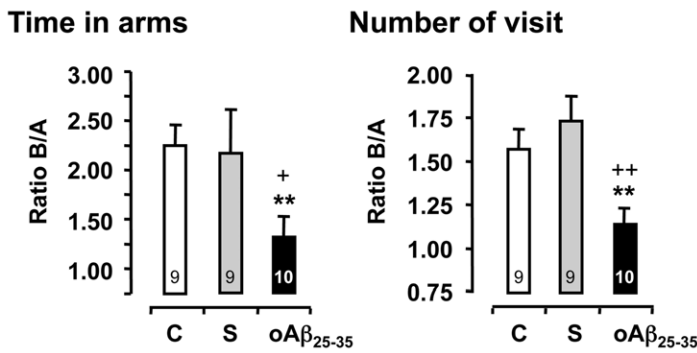

**D.**

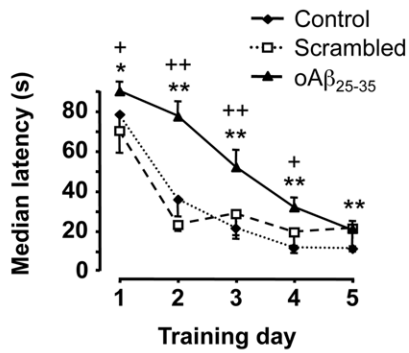

**E.**

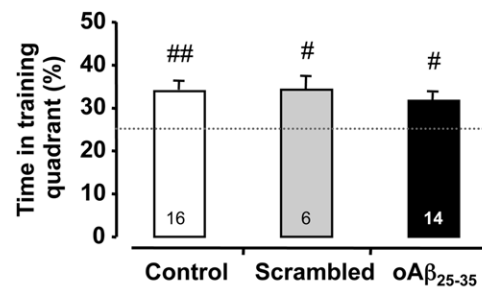

**F.**

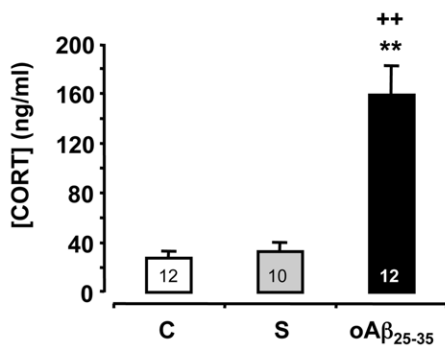

**Figure 2. Physiological and behavioral effects of oA $\beta_{25-35}$ .** **A.** Body weight variations determined 6 weeks after icv injection of scrambled A $\beta_{25-35}$  peptide (10  $\mu$ g/rat; scrambled group) or oA $\beta_{25-35}$  (10  $\mu$ g/rat; A $\beta_{25-35}$  group). The results are expressed as means  $\pm$  SEM (with n=6 per group). \* $p$ <0.05 vs. control value and + $p$ <0.05 vs. scrambled value). **B.** Variations in locomotor activity and body temperature determined 6 weeks after icv injection of scrambled A $\beta_{25-35}$  peptide (10  $\mu$ g/rat; scrambled group; n = 7) or oA $\beta_{25-35}$  (10  $\mu$ g/rat; oA $\beta_{25-35}$  group; n = 7). Locomotor activity and body temperature were monitored using telemetric sensors. The thick black line indicates the nocturnal phase (7:00 PM to 7:00 AM). The results are means/hour obtained the 6<sup>th</sup> week following the icv injection. **C.** Effects of oA $\beta_{25-35}$  icv injection (10  $\mu$ g/rat) on the ability of rats to perform a spatial short-term memory task (T-maze). Six weeks after icv injection, animals were allowed to explore the T-maze, with one short arm closed (B), for 10 min. After a 1 h time interval, the pattern of exploration of the whole maze was recorded for 2 min. The icv injection of the scrambled A $\beta_{25-35}$  peptide (10  $\mu$ g/rat) served as negative control. The results are expressed as means  $\pm$  SEM. \*\* $p$ <0.01 vs. control un-injected rats, + $p$ <0.05 and ++ $p$ <0.01 vs. scrambled treated rats. The number of animals in each group is indicated within the columns. **D.** Effects of oA $\beta_{25-35}$  icv injection (10  $\mu$ g/rat) on rat behavior in a spatial long-term memory test (Water-maze). Six weeks after icv injection, animals were allowed to swim for 90 s to find the training platform and 60 s without the platform for retention. The icv injection of the scrambled A $\beta_{25-35}$  peptide (10  $\mu$ g/rat) served as negative control. The results are expressed as means  $\pm$  SEM. \* $p$ <0.05 and \*\* $p$ <0.01 vs. control un-injected rats, + $p$ <0.05 and ++ $p$ <0.01 vs. scrambled treated rats. **E.** The probe test was performed 4 h after the last training trial in a single 60 s-duration swimming without platform. The presence in the training quadrant was analyzed over the chance level (25%): #  $p$ <0.05 and ##  $p$ <0.01. The number of animals in each group is indicated within the columns. **F.** Variations in plasmatic corticosterone (CORT) levels determined in rats 6 weeks after icv injection of A $\beta_{25-35}$  scrambled peptide (10  $\mu$ g/rat; negative control) or oA $\beta_{25-35}$  (10  $\mu$ g/rat). The values are means  $\pm$  SEM. \*\* $p$ <0.01 vs. control un-injected rats (control group: C) and ++ $p$ <0.01 vs. scrambled treated rats. The number of animals in each group is indicated within the columns. doi:10.1371/journal.pone.0053117.g002

and cleaved caspase-9 and -12, and pro-caspase-3). To detect cleaved caspase-3, VACHT and Iba1, tissues were homogenized using a specific lysis buffer (Triton X100 1%; Tris-HCl pH 7.5, 20 mM; NaCl 150 mM; EDTA 10 mM; Na<sub>3</sub>VO<sub>4</sub> 100  $\mu$ M) previously described by Cotrufo et al. [39]. Supernatants were collected and the protein concentration was measured using the BCA Kit (Pierce, France) and 20 to 40  $\mu$ g from each sample was taken for western blot analysis depending on the structure and antigen considered. Samples were boiled (5 min), separated by SDS-polyacrylamid gel (12%) and transferred to a nitrocellulose

membrane (Whatman, France). The membrane was incubated overnight (4°C) with a mouse anti-gial fibrillary acidic protein (GFAP) (1/1000; Sigma-Aldrich, France), or a rabbit anti-Iba-1 (1/750; Wako Chemicals, Japan), or a rabbit anti-VACHT (1/500; Sigma-Aldrich) or a rabbit anti-procaspase-3 and a rabbit monoclonal anti-caspase-3 (cleaved form) (1/1000 and 1/2000, respectively; Cell Signaling, France), or a rabbit anti-caspase-9 (pro- and cleaved forms; 1/1000; Cell Signaling), or a rat anti-caspase-12 (pro- and cleaved forms; 1/5000; Sigma-Aldrich, France) or a mouse anti- $\beta$ -tubulin ( $\beta$ -tub) (1/5000; Sigma-

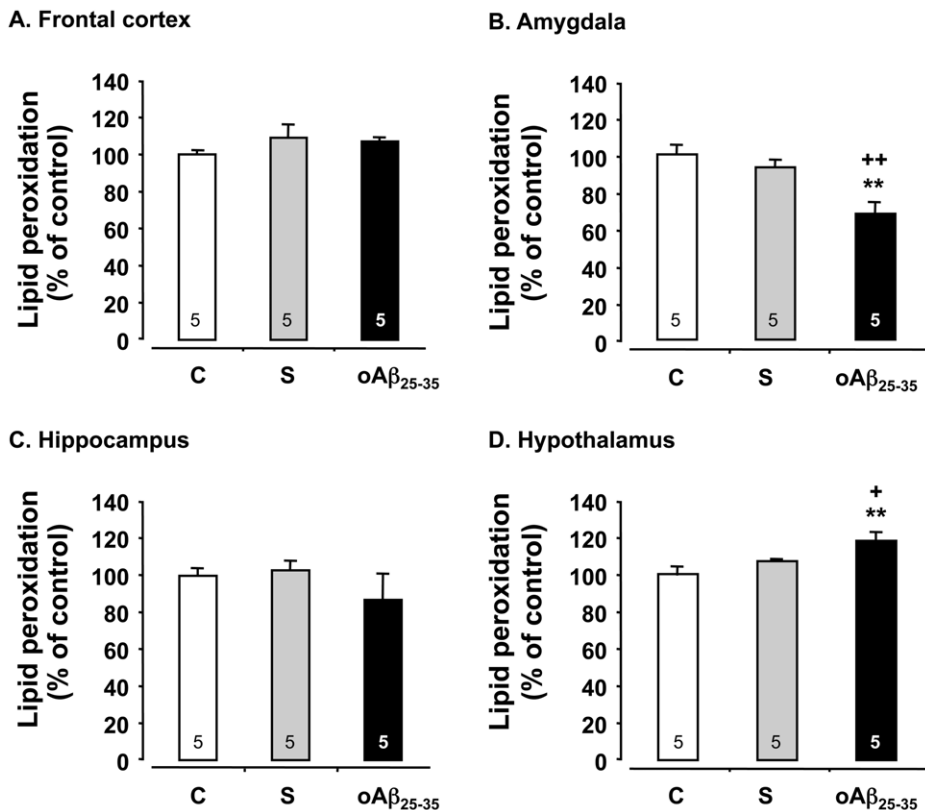

**Figure 3. Oxidative stress.** Variations in lipid peroxidation levels in the frontal cortex, amygdala, hippocampus and hypothalamus, determined in rats 6 weeks after icv injection of scrambled A $\beta_{25-35}$  peptide (10  $\mu$ g/rat; negative control) or oA $\beta_{25-35}$  (10  $\mu$ g/rat). The results are expressed as means  $\pm$  SEM. \*\* $p$ <0.01 vs. control un-injected rats (control group: C), + $p$ <0.05 and ++ $p$ <0.01 vs. scrambled treated rats. The number of animals in each group is indicated within the columns. doi:10.1371/journal.pone.0053117.g003

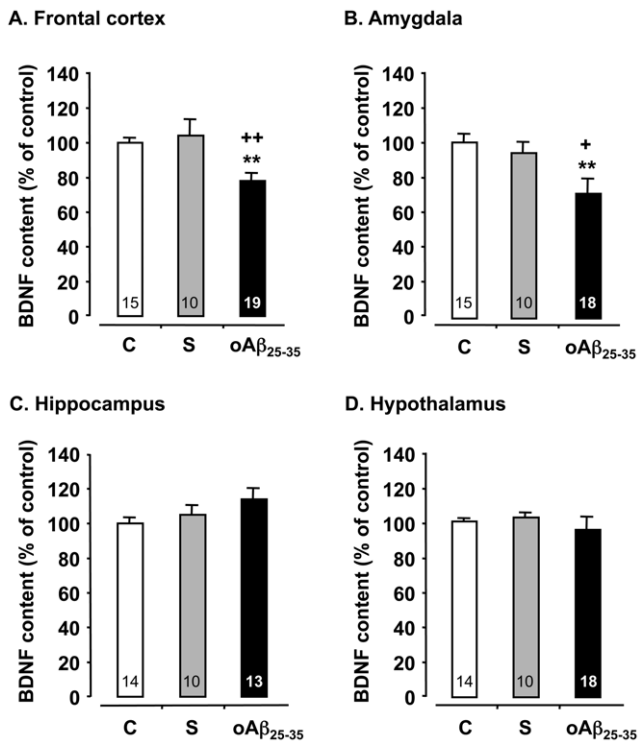

**Figure 4. Neurotrophic factor.** Variations in BDNF contents within the frontal cortex, amygdala, hippocampus and hypothalamus, determined in rats 6 weeks after icv injection of scrambled A $\beta_{25-35}$  peptide (10  $\mu$ g/rat; negative control) or oA $\beta_{25-35}$  (10  $\mu$ g/rat). The results are expressed as means  $\pm$  SEM. \*\* $p < 0.01$  vs. control un-injected rats (control group: C), + $p < 0.05$  and +++ $p < 0.01$  vs. scrambled treated rats. The number of animals in each group is indicated within the columns. doi:10.1371/journal.pone.0053117.g004

Aldrich). The membrane was then rinsed and incubated for 2 h with the appropriate horseradish peroxidase-conjugated secondary antibodies (Sigma-Aldrich). Peroxidase activity was revealed by using enhanced-chemiluminescence (ECL) reagents. The intensity of peroxidase activity was quantified using Image-J software (NIH, Bethesda, USA).  $\beta$ -tubulin was taken as loading control for all immunoblotting experiments and each value was normalized relative to respective  $\beta$ -tubulin level [20]. Note that in this study, the two antibodies against PSA-NCAM that were tested for western blot analysis (mouse monoclonal anti-PSA-NCAM, clone 2-2B, ref# MAB5324 from Millipore and mouse monoclonal anti-PSA-NCAM, ref# AbC0019 from AbCys SA) were unable to work in our conditions.

### APP Processing

As previously reported [20], 60  $\mu$ g from each sample was taken to western blot analysis following the same procedures detailed in 2.8. The primary antibody used to detect APP (125 kDa) and C99 fragment (13 kDa) was a rabbit anti-Amyloid Precursor Protein (PA1-84165: 1/750, ABR-Thermo-Scientific, France).

### Tau Phosphorylation

To determine the levels of Tau phosphorylation at specific sites, equal amounts of protein (varying from 60 and 80  $\mu$ g depending on the antibody used) from each sample were taken to western blot analysis following the same procedures detailed before. The primary antibodies to detect phospho-Tau epitopes (50 kDa) were a mouse AT8 (S<sup>199</sup>/S<sup>202</sup>/T<sup>205</sup>) and AT100 (T<sup>212</sup>/S<sup>214</sup>/T<sup>217</sup>)

antibodies (MN1020: 1/3000 and MN1060: 1/3000, respectively; ThermoScientific, France), and to detect total Tau (50 kDa) was a mouse anti-Tau antibody (MA1-38710: 1/5000, ThermoScientific, France).

### BDNF Content

Rats were sacrificed by decapitation and structures of interest were weighed, immediately frozen in liquid nitrogen and stored at  $-20^{\circ}\text{C}$  until assayed. Brain-derived neurotrophic factor (BDNF) content was measured with a conventional ELISA assay (BDNF Emax; Promega, France), as previously reported [40,41]. The assay sensitivity was 15 pg/tube. The BDNF concentration was expressed as pg/g wet weight. The intra- and inter-assay coefficients of variation were 3% and 6%, respectively.

### Histology (Cresyl Violet Staining; GFAP, Iba-1, PSA-NCAM, VAcHT Immunolabeling)

Animals were anaesthetized using an intramuscular injection of ketamine/xylazine solution and perfused intracardially (50 ml of NaCl 0.9% and 100 ml PO<sub>4</sub> 0.2 M containing 4% paraformaldehyde). Brains were removed and postfixed in the same fixative for 48 h (4 $^{\circ}$ C) and then in a solution of sucrose (30%) for 3 days. Thereafter, tissues were included in a block of OCT compound (Tissue-Tek, Sakura Finetek, USA) and quickly frozen in acetone chilled on dry ice. Frozen brains were mounted on a cryostat (Leica, France) and serially cut into 10  $\mu$ m coronal sections. For histology, they were stained with 0.2% cresyl violet reagent, dehydrated and mounted. The method used for neuronal count is a classical method used with thin brain sections (10  $\mu$ m) to quantify undamaged hippocampic cells [20,29,42,43]. The counting was made using images captured with Leica DFC495 high-resolution camera (Leica Microsystems, Nanterre, France) attached to Leica DM2500 microscope (Leica) and the Leica LAS Core image analysis software (Leica). For this purpose, digitized images acquired using a  $\times 40$  objective were transformed into TIFF files and brought to the same level of contrast and sharpness using the software. Four sections were studied from each brain, taken from the anterior hippocampus level ( $-3.0$  to  $-4.0$  from the bregma) [35], with intervals of 250  $\mu$ m. Sections were selected on a subjective random basis. Three fields were analyzed per hippocampus for CA1, one for CA2 and CA3 and two for DG. Counts of undamaged cells were made using ImageJ software on TIFF captured images. Neuron densities on slices (number of neurons in the optical field expressed as the number of cells per mm<sup>2</sup>) were calculated as the arithmetic mean number of neurons in the two hemispheres and, for each animal, as the arithmetic mean of results obtained for each of the four slices. The count of undamaged cells in the CA1, CA2, CA3 and DG fields of the hippocampus was done by two different scientists unaware of the experimental conditions and independently from each other using display projections of the images (each person performed cell count for all animals included into the experiment and no difference was observed between the two independent and unaware analyses).

Analyses of the glial (GFAP) and acetylcholine (VAcHT) markers were conducted according to a diaminobenzidine (DAB) immunohistochemistry approach, while analyses of the microglial (Iba-1) and neurogenesis (PSA-NCAM) markers were conducted according to a fluorescent immunohistochemistry approach [20,40]. Sections were incubated overnight at room temperature with a mouse anti-GFAP (1/1000, Sigma-Aldrich), or a rabbit anti-Iba-1 (1/500; Wako Chemicals, Japan), or a rabbit anti-VAcHT (1/500; Sigma-Aldrich) or a rabbit anti-PSA-NCAM antibody (1/200; Abcys, France). Then sections were incubated

**A. Frontal cortex**

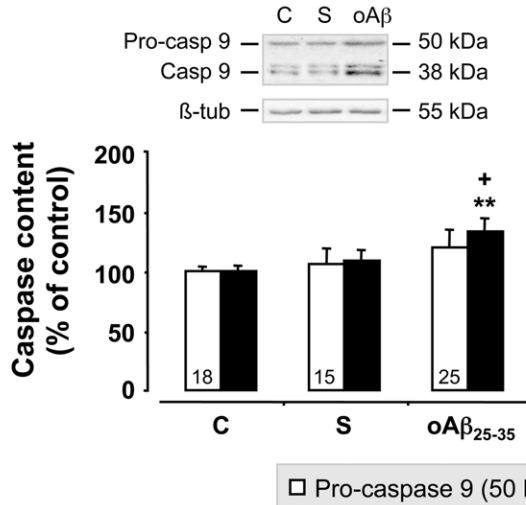

**B. Amygdala**

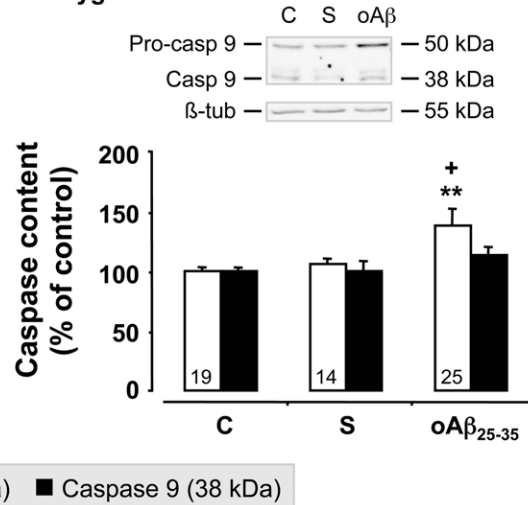

**C. Hippocampus**

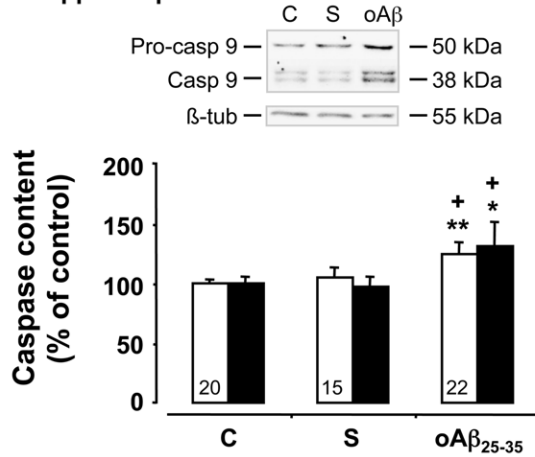

**D. Hypothalamus**

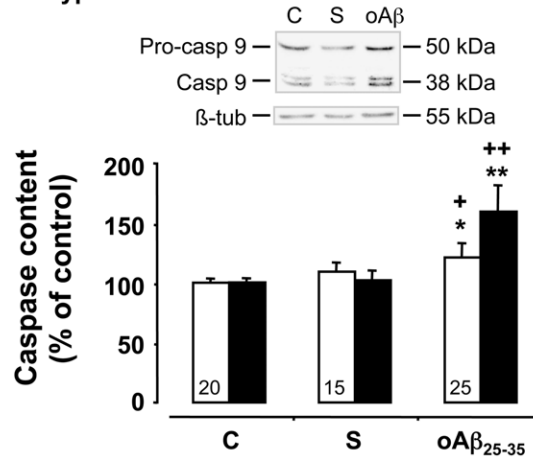

**Figure 5. Mitochondrial stress.** Pro- and activated caspase-9 levels within the frontal cortex, amygdala, hippocampus and hypothalamus, determined in rats by western blot 6 weeks after oA $\beta_{25-35}$  icv injection (10  $\mu$ g/rat). Pro-caspase-9 (50 kDa) and activated caspase-9 (38 kDa) variations were normalized with  $\beta$ -tubulin ( $\beta$ -tub, 55 kDa) variations and compared with un-injected rats (control group: C). The results are expressed as means  $\pm$  SEM. \* $p$ <0.05 and \*\* $p$ <0.01 vs. control group, + $p$ <0.05 and ++ $p$ <0.01 vs. scrambled treated rats. Note that scrambled peptide injection (10  $\mu$ g/rat) served as negative control and did not induce any modifications in pro- and activated caspase-9 levels. The number of animals in each group is indicated within the columns. doi:10.1371/journal.pone.0053117.g005

for 2 h with the appropriate biotinylated (anti-GFAP and anti-VACHT) or fluorescent (Alexafluor-488; anti-Iba-1 and Alexafluor-555; anti-PSA-NCAM) secondary antibody (Sigma-Aldrich or Molecular Probes, The Netherlands). Biotinylated sections were incubated for 1 h in avidin-biotin complex (ABC kit; Vector Laboratories, USA). Signals were detected with the diaminobenzidine kit (Vector Laboratories), according to the manufacturer's instructions, while nuclei of fluorescent sections were counterstained with 4',6'-diamino-2-phenylindole (DAPI, Molecular Probes). The immunostaining specificity was determined with the same protocol but by incubating control sections with the secondary antiserum alone.

**A $\beta_{25-35}$  Distribution**

We used a tagged peptide with a fluorescent dye (oA $\beta_{25-35}$  HiLyte Fluor 488, ANASPEC/Eurogentec, France) (oA $\beta_{25-35}$ -HLF) to analyze the distribution within brain structures of the

injected oA $\beta_{25-35}$  fragment. The ability of the tagged peptide to form amyloid fibrils after 4 days of incubation at 37°C was previously assessed by electron microscopy and Congo red staining [20]. Six weeks following the icv injection of oA $\beta_{25-35}$ -HLF, animals were anaesthetized using an intra-muscular injection of ketamine/xylazine solution and perfused intracardially, as previously described. Brains were removed and postfixed in the same fixative for 3 days (4°C) and serially cut with a vibrating blade microtome (Leica) into 30  $\mu$ m coronal sections. Before to be mounted, sections were counterstained with DAPI to visualize nuclei.

**Statistical Analysis**

Data are presented as mean  $\pm$  SEM. Comparisons were performed using one-way or two-way ANOVA (F values) followed by a Fisher's multiple comparison test.  $P$ < 0.05 was considered significant.

**A. Frontal cortex**

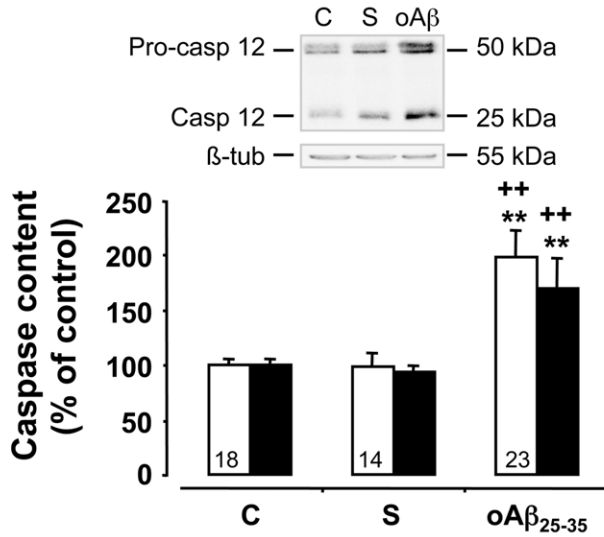

**B. Amygdala**

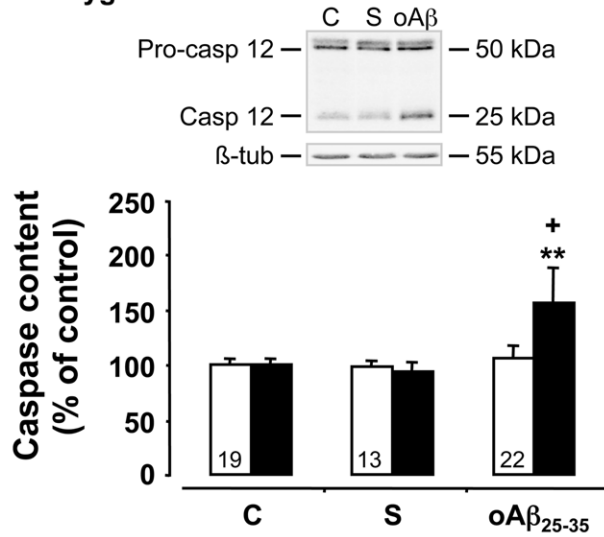

□ Pro-caspase 12 (50 kDa) ■ Caspase 12 (25 kDa)

**C. Hippocampus**

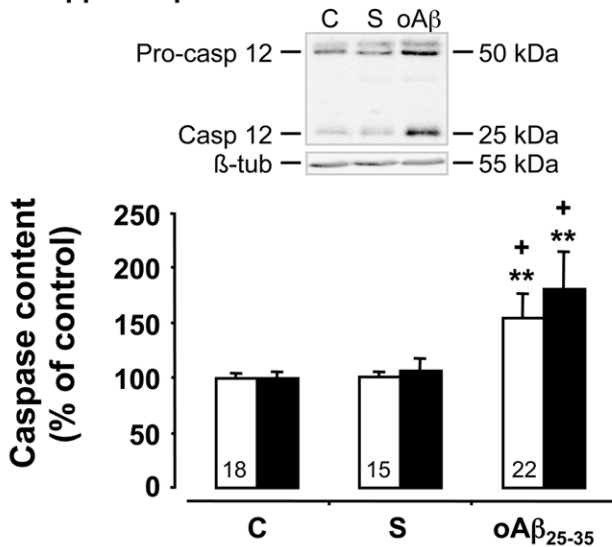

**D. Hypothalamus**

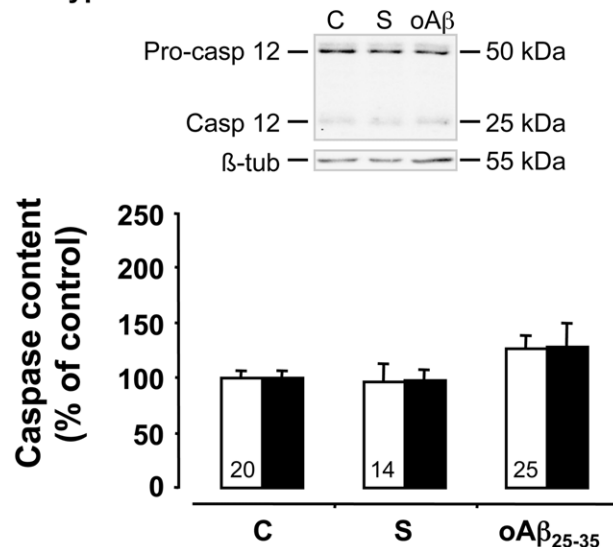

**Figure 6. ER stress.** Variations in pro- and activated caspase-12 levels in the frontal cortex, amygdala, hippocampus and hypothalamus, determined in rats by western blot 6 weeks after oA $\beta_{25-35}$  icv injection (10  $\mu$ g/rat). Pro-caspase-12 (50 kDa) and activated caspase-12 (25 kDa) variations were normalized with  $\beta$ -tubulin ( $\beta$ -tub, 55 kDa) variations and compared with untreated rats (control group: C). The results are expressed as means  $\pm$  SEM. \* $p$ <0.05 and \*\* $p$ <0.01 vs. control group, + $p$ <0.05 and ++ $p$ <0.01 vs. scrambled treated rats. Note that scrambled peptide injection (10  $\mu$ g/rat) served as negative control and did not induce any modifications in pro- and activated caspase-12 levels. The number of animals in each group is indicated within the columns.

doi:10.1371/journal.pone.0053117.g006

**Results**

**Regional Distribution of A $\beta_{25-35}$ -HLF Showed Persistent Presence of oA $\beta_{25-35}$  after 6 Weeks in the Brain**

The regional distribution of oA $\beta_{25-35}$ -HLF 6 weeks after injection is presented in Fig. 1A–I. Control rat sections were treated and examined in the same conditions as injected rat sections and displayed no specific labeling. oA $\beta_{25-35}$ -HLF labeling was relatively discreet, suggesting a progressive clearance of the peptide after 6 weeks in comparison to previous study [20]. However, oA $\beta_{25-35}$ -HLF was again found at the injection site level

where it was trapped by local cells (Fig. 1A). The fluorescent peptide was also found in brain ventricles, particularly in the lateral ventricle (LV) (Fig. 1B–C), and at the dorsal (D3V) and ventral (3V) parts of the third ventricle (Fig. 1D–F). At this level, oA $\beta_{25-35}$ -HLF was found in ependymal cells bordering ventricles and in the surrounding brain structures (Fig. 1B–F). The fluorescent peptide was found in the walls of blood vessels particularly in the amygdala, frontal (Fig. 1G) and parietal cortex, but also in hypothalamus and thalamus (Fig. 1H) regions. As previously reported, in addition to ependymal cells, oA $\beta_{25-35}$ -HLF was found in neurons (Fig. 1H–I) and in glial cells, particularly in



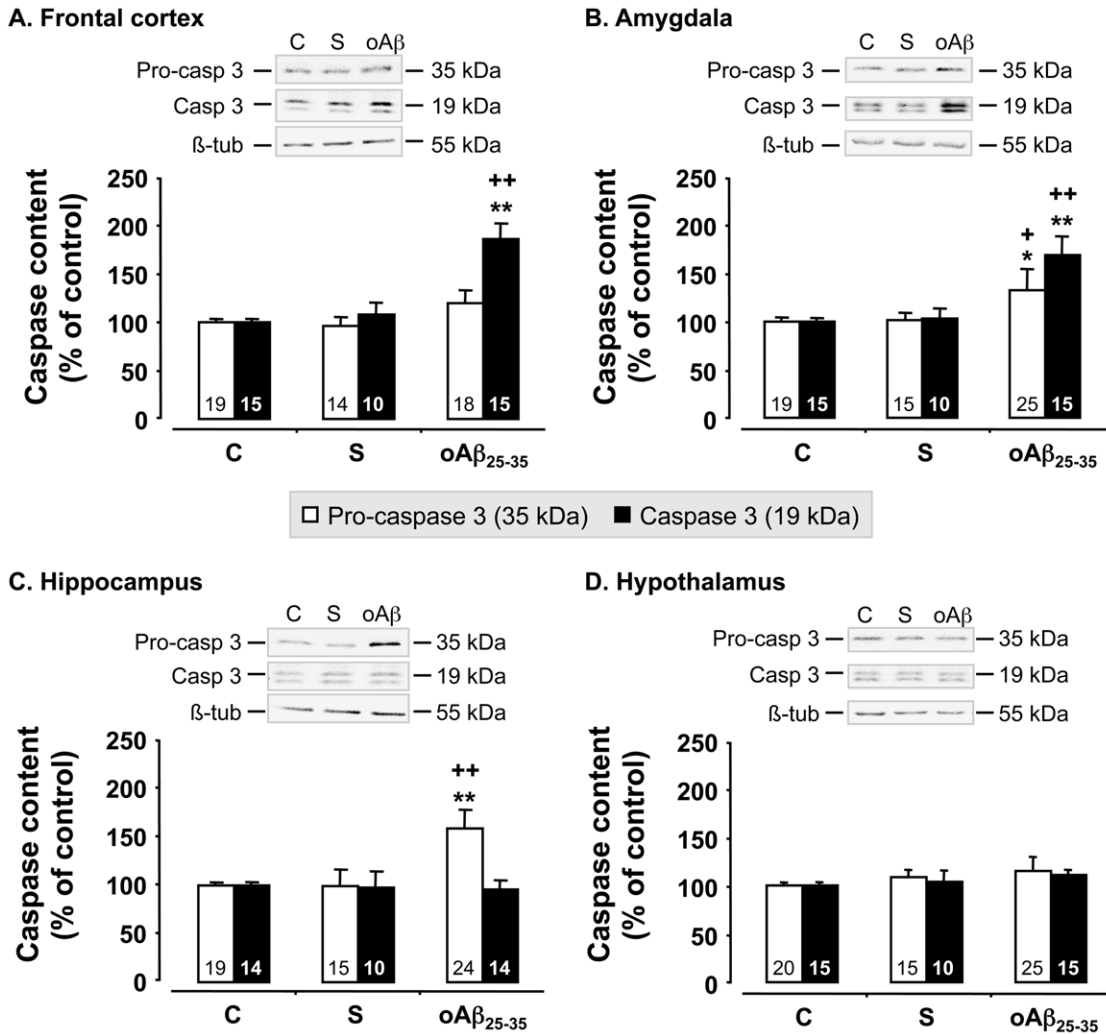

**Figure 7. Apoptosis.** Variations in pro- and activated caspase-3 levels in the frontal cortex, amygdala, hippocampus and hypothalamus, determined in rats by western blot 6 weeks after oA $\beta_{25-35}$  icv injection (10  $\mu$ g/rat). Pro-caspase-3 (35 kDa) and activated caspase-3 (19 kDa) variations were normalized with  $\beta$ -tubulin ( $\beta$ -tub, 55 kDa) variations and compared with untreated rats (control group: C). The results are expressed as means  $\pm$  SEM. \* $p < 0.05$  and \*\* $p < 0.01$  vs. control group, + $p < 0.05$  and ++ $p < 0.01$  vs. scrambled peptide injection (10  $\mu$ g/rat) served as negative control and did not induce any modifications in pro- and activated caspase-3 levels. The number of animals in each group is indicated within the columns.

doi:10.1371/journal.pone.0053117.g007

the median eminence (Fig. 1E), but also in nerve fibers, principally in the hippocampus (Fig. 1I).

#### 4-days Incubation of A $\beta_{25-35}$ Led Almost Exclusively to Soluble Oligomers

In addition to a previous qualitative study [20], where we have evidenced the amyloid property of the aggregated A $\beta_{25-35}$  peptide, we have determined in the present work the respective quantity of each particle species contained in the solution injected in rats. The characterization of the aggregated A $\beta_{25-35}$  solution was realized by PCS and is presented in Figure 1J. This figure shows the size distribution of the oligomeric species in the aggregated A $\beta_{25-35}$  solution. After 4-days incubation at 37°C, the sample is composed of particles with an average diameter of 103.4 nm (weighted average, min/max: 50.7/712.4 nm) (red curve). In order to determine the size of particles that populated the aggregated A $\beta_{25-35}$  solution, a low-speed centrifugation was carried out at 1 000 g for 15 min. PCS analysis of the pellet resuspended in water (purple curve) indicated that the particle size extended from 295.3 to 825 nm with a peak

maximum at 458.7 nm and an average diameter of 479.5 nm. For the supernatant (green curve), the weighted average diameter of particles was 60.0 nm with a peak maximum at 50.7 nm. Similar size of particles (weighted average diameter of 52.8 nm) was measured in the supernatant after centrifugation at 16 000 g (blue curve). Note that these particles had a size with at least one order of magnitude higher than the monomer form of A $\beta_{25-35}$  peptide in HFIP (black curve). This suggests that the aggregated A $\beta_{25-35}$  solution that has been used for icv injection (red curve) is mainly composed of a mixture of soluble oligomer species whose sizes extended from 52.8 to 295.3 nm (98.1%). Some high-density aggregates with a diameter greater or equal at 458.7 nm were also detectable but in low proportion (1.8%).

#### oA $\beta_{25-35}$ Injection in Rats Failed to Affect Body Weight and Physiological Rhythms

At the beginning of the experiment, the three groups of rats presented no body weight differences ( $F_{2,15} = 0.10$ ;  $p > 0.05$ ) (Fig. 2A). By contrast, body weight gain was decreased 6 weeks

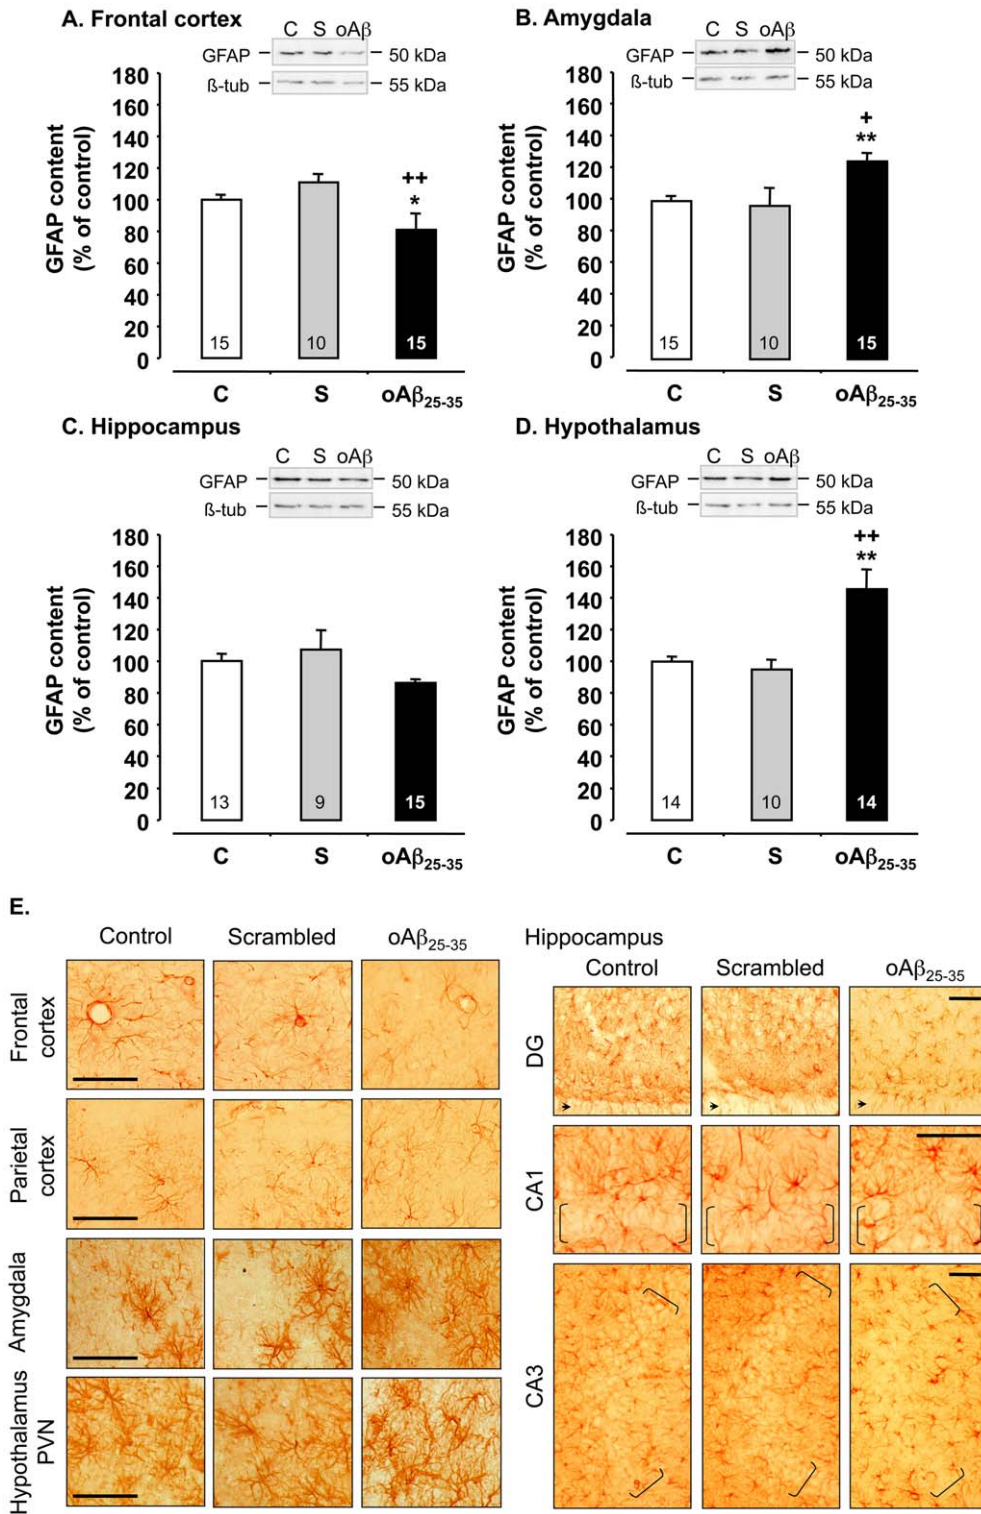

**Figure 8. Astrocyte activation.** **A.** Variations in GFAP levels in the frontal cortex, amygdala, hippocampus and hypothalamus, determined in rats by western blot 6 weeks after icv injection of scrambled A $\beta_{25-35}$  peptide (10  $\mu$ g/rat; negative control) or oA $\beta_{25-35}$  (10  $\mu$ g/rat). GFAP (50 kDa) variations were normalized with  $\beta$ -tubulin ( $\beta$ -tub, 55 kDa) variations and compared with untreated rats (control group: C). The results are expressed as means  $\pm$  SEM. \* $p$ <0.05 and \*\* $p$ <0.01 vs. control group, + $p$ <0.05 and ++ $p$ <0.01 vs. scrambled treated rats. The number of animals in each group is indicated within the columns. **B.** Effects of oA $\beta_{25-35}$  (10  $\mu$ g/rat) icv injection on astrocyte reactions using GFAP immunolabeling into the frontal and parietal cortex, amygdala, hippocampus (CA1, CA2 & CA3 regions) and hypothalamus (periventricular nucleus: PeVN & paraventricular nucleus: PVN) determined in control (C) untreated rats and 6 weeks after A $\beta_{25-35}$  injection. The scrambled peptide injection (10  $\mu$ g/rat) served as negative control and did not induce any modifications in the GFAP signal. 3v: third ventricle. brackets: hippocampus layer of granular cells layer. Scale bar = 60  $\mu$ m. doi:10.1371/journal.pone.0053117.g008

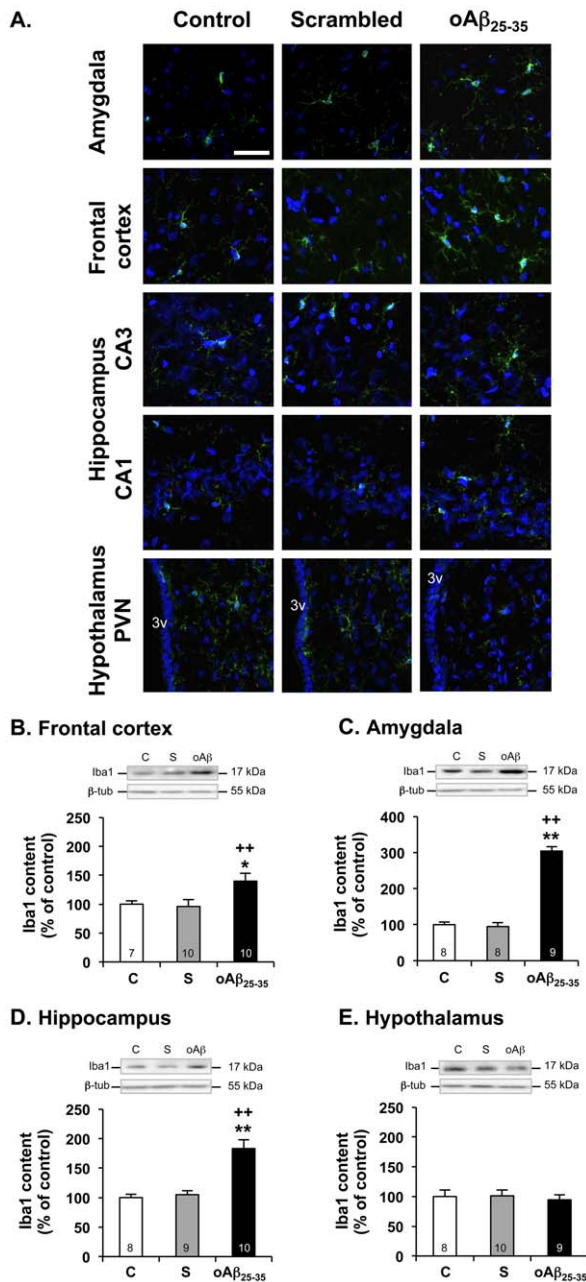

**Figure 9. Microglial activation.** **A.** Effects of oA $\beta_{25-35}$  (10  $\mu$ g/rat) icv injection on microglial reaction using Iba-1 immunolabeling in the amygdala, frontal and parietal cortex, hypothalamus (paraventricular nucleus: PVN) and hippocampus (CA1 & CA3 regions) determined in control untreated rats and 6 weeks after A $\beta_{25-35}$  scrambled peptide (10  $\mu$ g/rat; negative control) or A $\beta_{25-35}$  injection. Activated microglia was visualized with Alexafluor 488-labeled specific antibody against Iba-1 (green immunolabeling), while the nucleus was counterstained with DAPI (blue labeling). 3v: third ventricle. Scale bar = 100  $\mu$ m. **B-E.** Variations in Iba1 levels in the frontal cortex (B), amygdala (C), hippocampus (D) and hypothalamus (E), determined in rats by western blot 6 weeks after icv injection of scrambled A $\beta_{25-35}$  peptide (10  $\mu$ g/rat; negative control) or oA $\beta_{25-35}$  (10  $\mu$ g/rat). Iba1 (17 kDa) variations were normalized with  $\beta$ -tubulin ( $\beta$ -tub, 55 kDa) variations and compared with untreated rats (control group: C). The results are expressed as means  $\pm$  SEM. \* $p$ <0.05 and \*\* $p$ <0.01 vs. control group, + $p$ <0.05 and ++ $p$ <0.01 vs. scrambled treated rats. The number of animals in each group is indicated within the columns. doi:10.1371/journal.pone.0053117.g009

after the icv injection of oA $\beta_{25-35}$  as compared to control and scrambled peptide-injected rats ( $F_{2,15} = 5.18$ ;  $p < 0.05$ ), with a comparable value as previously observed [20].

Locomotor activity and body temperature rhythms were continuously recorded using telemetric transmitters and revealed only circadian differences but not among groups (Fig. 2B). In details, the two-way repeated measure ANOVA for locomotor activity and body temperature data revealed a significant difference between night and day values but no difference induced by oA $\beta_{25-35}$  icv injection (locomotor activity:  $F_{1,276} = 0.13$ ,  $p > 0.05$  for treatment;  $F_{23,276} = 14.5$ ,  $p < 0.0001$  for time and  $F_{23,276} = 0.65$ ,  $p > 0.05$  for interaction; body temperature:  $F_{1,276} = 0.73$ ,  $p > 0.05$  for treatment;  $F_{23,276} = 31.2$ ,  $p < 0.0001$  for time and  $F_{23,276} = 0.55$ ,  $p > 0.05$  for interaction).

### 6 Weeks after oA $\beta_{25-35}$ Injection, Rats Showed Impaired Learning and Memory Capacities

The ability of rats to perform a spatial short-term memory task was examined using delayed alternation in the T-maze (Fig. 2C). The oA $\beta_{25-35}$  injection induced memory deficits, since analyses of ratios of time spent and the number of visits in the novel arm over the familiar one revealed significant effects ( $F_{2,25} = 8.09$ ;  $p < 0.01$  and  $F_{2,25} = 3.93$ ;  $p < 0.05$ , respectively), while scrambled peptide-injected rats presented no deficits as compared to control animals (Fig. 2C).

The spatial reference memory was analyzed using a water-maze procedure. When rats started training 6 weeks after peptide injection (Fig. 2D), acquisition profiles decreased with training. Two-way repeated measure ANOVA showed an effect of training trials and a treatment effect:  $F_{2,260} = 28.7$ ,  $p < 0.0001$  for the treatment,  $F_{4,260} = 131$ ,  $p < 0.0001$  for trials and  $F_{8,260} = 3.96$ ,  $p < 0.001$  for the interaction (Fig. 2D). These data outlined an alteration of acquisition performances. However, when animals were submitted to the probe test (Fig. 2E), oA $\beta_{25-35}$ -treated rats showed a preferential presence in the training quadrant similarly as scrambled peptide-treated and control rats. The peptide injection therefore only slowed down place learning acquisition but did not impeded it.

### 6 Weeks after oA $\beta_{25-35}$ Injection, Rats Showed a Marked Endocrine Stress

The oA $\beta_{25-35}$  icv injection significantly increased plasma CORT concentrations after 6 weeks when compared with control and scrambled peptide-injected rats ( $F_{2,31} = 53.8$ ,  $p < 0.0001$ ) (Fig. 2F).

### Analyses of Cellular Markers in oA $\beta_{25-35}$ Injected Rats

When compared to control and scrambled peptide-injected rats, the oA $\beta_{25-35}$  icv injection induced after 6 weeks an increase in lipid peroxidation level in the hypothalamus ( $F_{2,12} = 4.95$ ,  $p < 0.05$ ) (Fig. 3D), while in the amygdala, oA $\beta_{25-35}$  induced a significant decrease in lipid peroxidation levels ( $F_{2,12} = 17.7$ ,  $p < 0.001$ ) (Fig. 3B). By contrast, no difference in peroxidized lipids was observed in the frontal cortex ( $F_{2,12} = 1.17$ ,  $p > 0.05$ ) (Fig. 3A) and the hippocampus ( $F_{2,12} = 3.05$ ,  $p > 0.05$ ) (Fig. 3C) in control, scrambled peptide- and oA $\beta_{25-35}$ -injected rats.

As a major neuroprotective system, BDNF contents were analyzed in the rat brain structures. BDNF levels in the frontal cortex (Fig. 4A) and amygdala (Fig. 4B) were decreased 6 weeks after oA $\beta_{25-35}$ -treated rats, when compared to control and scrambled peptide-injected rats ( $F_{2,41} = 3.76$ ,  $p < 0.05$  and  $F_{2,40} = 5.33$ ,  $p < 0.01$ , respectively). By contrast, the oA $\beta_{25-35}$  injection induced no modification of BDNF content in the

**A. Nucleus Basalis (Meynert)**

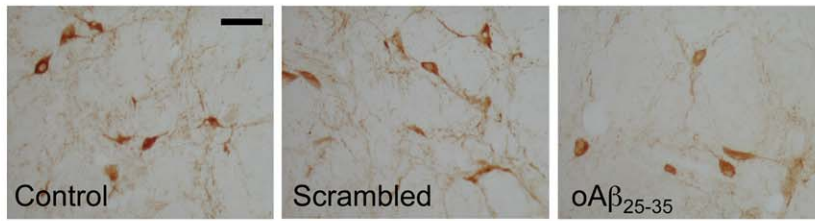

**B. Hypothalamus**

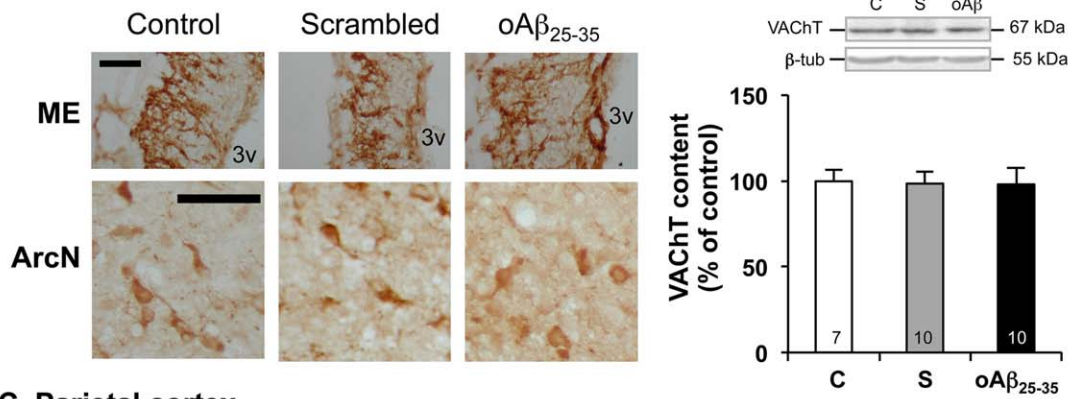

**C. Parietal cortex**

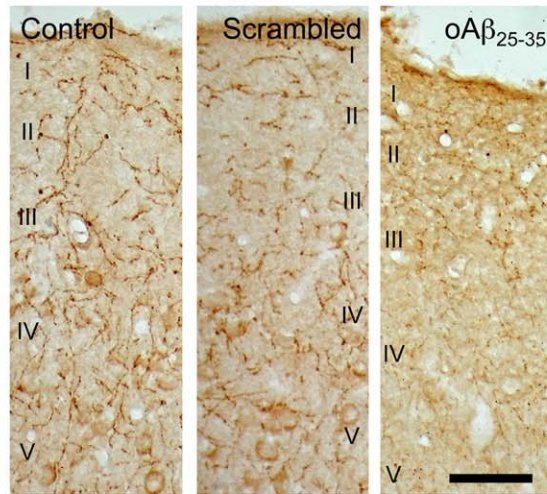

**D. Hippocampus**

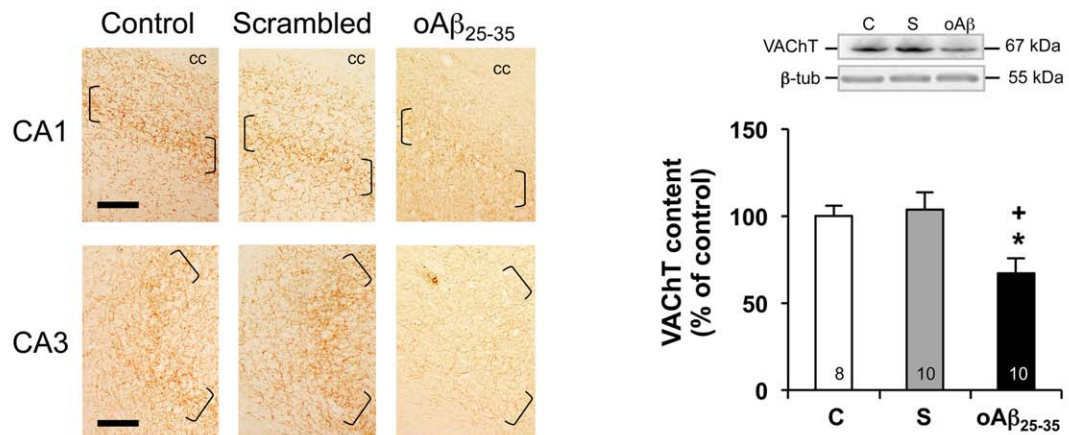

**Figure 10. Cholinergic system.** Effects of oA $\beta_{25-35}$  (10  $\mu$ g/rat) icv injection on VAcHT immunolabelling within the nucleus basalis of Meynert (A), mediobasal hypothalamus (B), parietal cortex (C) and hippocampus (D) determined in control untreated rats and 6 weeks after A $\beta_{25-35}$  injection. In (B): 3v: third ventricle. In (C): levels I to V cortical layers are indicated. In (D): brackets show the hippocampus granular cell layer. cc: corpus callosum. Scale bars = 100  $\mu$ m. Variations in VAcHT levels in the hypothalamus (B) and hippocampus (D), determined in rats by western blot 6 weeks after icv injection of scrambled A $\beta_{25-35}$  peptide (10  $\mu$ g/rat; negative control) or oA $\beta_{25-35}$  (10  $\mu$ g/rat). VAcHT (70 kDa) variations were normalized with  $\beta$ -tubulin ( $\beta$ -tub, 55 kDa) variations and compared with untreated rats (control group: C). The results are expressed as means  $\pm$  SEM. \* $p$ <0.05 and \*\* $p$ <0.01 vs. control group, + $p$ <0.05 and ++ $p$ <0.01 vs. scrambled treated rats. The number of animals in each group is indicated within the columns. doi:10.1371/journal.pone.0053117.g010

hippocampus ( $F_{2,36} = 1.85$ ,  $p > 0.05$ ) (Fig. 4C) and hypothalamus ( $F_{2,39} = 1.05$ ,  $p > 0.05$ ) (Fig. 4D).

We used western blot analyses to measure the levels of pro- and activated caspase-9, an index of mitochondrial alteration, in the cerebral structures of interest, before (control rats) and 6 weeks after scrambled peptide or oA $\beta_{25-35}$  injection (Fig. 5). While scrambled peptide injection failed to affect pro- and cleaved caspase-9 levels, oA $\beta_{25-35}$  induced an increase in pro-caspase-9 levels in the amygdala (+38%;  $F_{2,55} = 9.25$ ,  $p < 0.001$ ) (Fig. 5B), hippocampus (+25%;  $F_{2,54} = 5.67$ ,  $p < 0.01$ ) (Fig. 5C) and hypothalamus (+21%;  $F_{2,57} = 3.43$ ,  $p < 0.05$ ) (Fig. 5D), but not in the frontal cortex ( $F_{2,55} = 2.17$ ;  $p > 0.05$ ) (Fig. 5A). Cleaved caspase-9 levels were increased after A $\beta_{25-35}$  injection in the frontal cortex (+33%;  $F_{2,55} = 3.74$ ,  $p < 0.05$ ) (Fig. 5A), hippocampus (+31%;  $F_{2,54} = 2.70$ ,  $p < 0.05$ ) (Fig. 5C) and hypothalamus (+59%;  $F_{2,57} = 14.6$ ,  $p < 0.0001$ ) (Fig. 5D), while no effect was observed in the amygdala ( $F_{2,55} = 2.08$ ;  $p > 0.05$ ) (Fig. 5B).

We used western blot analyses to measure the levels of pro- and cleaved caspase-12, one of endoplasmic reticulum (ER) stress induction, before (control rats) and 6 weeks after scrambled peptide or oA $\beta_{25-35}$  injection (Fig. 6). The scrambled peptide injection failed to affect pro- and cleaved caspase-12 levels, but oA $\beta_{25-35}$  induced significant effects (Fig. 6). In detail, oA $\beta_{25-35}$  injection increased pro-caspase-12 only in the frontal cortex (+98%;  $F_{2,52} = 24.6$ ,  $p < 0.0001$ ) (Fig. 6A) and hippocampus (+55%;  $F_{2,52} = 10.0$ ,  $p < 0.001$ ) (Fig. 6C), while no effect was observed in the amygdala ( $F_{2,53} = 0.16$ ,  $p > 0.05$ ) (Fig. 6B) and hypothalamus ( $F_{2,56} = 1.97$ ,  $p > 0.05$ ) (Fig. 6D). Cleaved caspase-12 was not increased after oA $\beta_{25-35}$  injection in the hypothalamus ( $F_{2,56} = 1.67$ ,  $p > 0.05$ ) (Fig. 6D), while a marked increase was observed in the frontal cortex (+70%;  $F_{2,52} = 10.9$ ,  $p < 0.001$ ) (Fig. 6A), amygdala (+56%;  $F_{2,53} = 3.86$ ,  $p < 0.05$ ) (Fig. 6B) and hippocampus (+81%;  $F_{2,52} = 10.8$ ,  $p < 0.0001$ ) (Fig. 6C).

We used western blot analyses to measure the levels of pro- and cleaved caspase-3, one of the apoptotic effective caspases, before (control rats) and 6 weeks after scrambled peptide or oA $\beta_{25-35}$  injection (Fig. 7). Scrambled peptide injection failed to affect pro- and cleaved caspase-3 levels, but oA $\beta_{25-35}$  induced an increase in pro-caspase-3 levels in the amygdala (+32%;  $F_{2,56} = 3.42$ ,  $p < 0.05$ ) (Fig. 7B) and hippocampus (+59%;  $F_{2,54} = 17.0$ ,  $p < 0.0001$ ) (Fig. 7C), but no effect in the frontal cortex ( $F_{2,48} = 2.84$ ,  $p > 0.05$ ) (Fig. 7A) and hypothalamus ( $F_{2,57} = 1.70$ ,  $p > 0.05$ ) (Fig. 7D). oA $\beta_{25-35}$  injection induced a marked increase in cleaved caspase-3 levels in the frontal cortex (+79%;  $F_{2,37} = 19.1$ ,  $p < 0.0001$ ) (Fig. 7A) and amygdala (+68%;  $F_{2,37} = 19.1$ ,  $p < 0.0001$ ) (Fig. 7B), while no effect was observed in the hippocampus ( $F_{2,35} = 0.03$ ,  $p > 0.05$ ) (Fig. 7C) and hypothalamus ( $F_{2,37} = 1.54$ ,  $p > 0.05$ ) (Fig. 7D).

### 6 Weeks after oA $\beta_{25-35}$ Injection, Astroglial and Microglial Reactions Revealed Neuroinflammation

GFAP level, a marker of astroglial reactivity, was modified 6 weeks after oA $\beta_{25-35}$  injection in the frontal cortex ( $F_{2,37} = 3.35$ ,  $p < 0.05$ ) (Fig. 8A), amygdala ( $F_{2,37} = 4.62$ ,  $p < 0.05$ ) (Fig. 8B), and hypothalamus ( $F_{2,35} = 16.7$ ,  $p < 0.0001$ ) (Fig. 8D), but not in the hippocampus ( $F_{2,34} = 1.70$ ,  $p > 0.05$ ) (Fig. 8C), as compared to

control and scrambled peptide icv-injected rats. In the amygdala and hypothalamus, astroglial activity increased by 25 and 46%, respectively, 6 weeks after oA $\beta_{25-35}$  injection. By contrast in the frontal cortex, GFAP level was decreased by 20%, 6 weeks after oA $\beta_{25-35}$  injection (Fig. 8A).

Increased GFAP immunoreactivity, indicative of astrogliosis was noted, essentially throughout the amygdala and hypothalamus (Fig. 8E), while no modification was observed in the parietal cortex and CA1 region of the hippocampus and a decrease was noted in the frontal cortex and other hippocampal regions (DG and CA3). Scrambled peptide icv injection did not induce any astrogliosis modification in the structures of interest (Fig. 8E).

Increased Iba-1 immunoreactivity, indicative of microgliosis, was essentially observed in the amygdala, frontal cortex and hippocampus 6 weeks after icv injection of oA $\beta_{25-35}$  (Fig. 9A). By contrast, no modification was observed in the hypothalamus of oA $\beta_{25-35}$  injected rats or in any of the structures considered in control and scrambled peptide icv injected rats (Fig. 9A). These immunohistochemistry observations were confirmed by western blot analysis. Indeed, microglial activity (Iba1 level) was increased 6 weeks after oA $\beta_{25-35}$  injection in the frontal cortex ( $F_{2,23} = 6.66$ ,  $p < 0.01$ ; +40% *vs.* control) (Fig. 9B), amygdala ( $F_{2,23} = 146$ ,  $p < 0.01$ ; +204% *vs.* control) (Fig. 9C), and hippocampus ( $F_{2,24} = 19.4$ ,  $p < 0.01$ ; +83% *vs.* control) (Fig. 8D), but not in the hypothalamus ( $F_{2,24} = 0.79$ ,  $p > 0.05$ ) (Fig. 8E), as compared to control and scrambled peptide icv-injected rats.

### Decrease Density of Cholinergic Neurons and Terminals was Observed 6 Weeks after oA $\beta_{25-35}$ Injection

In control rats, large numbers of VAcHT-positive cell bodies were seen in the nucleus basalis (Meynert) (Fig. 10A). In the hypothalamus, a very dense plexus of VAcHT immunoreactive fibers were present in the external layer of the median eminence and weakly VAcHT-positive cell bodies were noted in the arcuate nucleus (Fig. 10B). A dense network of VAcHT-positive nerve fibers was seen in the parietal cortex, with the highest density in layers I, IV and V (Fig. 10C). In the hippocampal formation (Fig. 10D), the highest density of VAcHT-positive fibers was seen in the pyramidal cell layer of CA1-CA3 regions. No modification was observed after scrambled peptide icv injection. By contrast, oA $\beta_{25-35}$  icv injection appeared to induce a pronounced decrease in VAcHT immunolabeling in the nucleus basalis (Fig. 10A), parietal cortex (Fig. 10C) and hippocampus (Fig. 10D), while no effect seemed to be induced by oA $\beta_{25-35}$  injection in the hypothalamus (Fig. 10B). These immunohistochemistry observations were confirmed by western blot analysis particularly in well-defined structures, i.e. hypothalamus (Fig. 10B;  $F_{2,24} = 0.02$ ,  $p > 0.05$ ) and hippocampus (Fig. 10D;  $F_{2,25} = 5.59$ ;  $p < 0.01$ ; -23% *vs.* control).

### Hippocampus Integrity was also Impaired 6 Weeks after oA $\beta_{25-35}$ Injection

Loss of pyramidal cells in the hippocampus was determined using Cresyl violet staining before (control) and 6 weeks after scrambled peptide or oA $\beta_{25-35}$  injection (Fig. 11A). No modifica-

**A.**

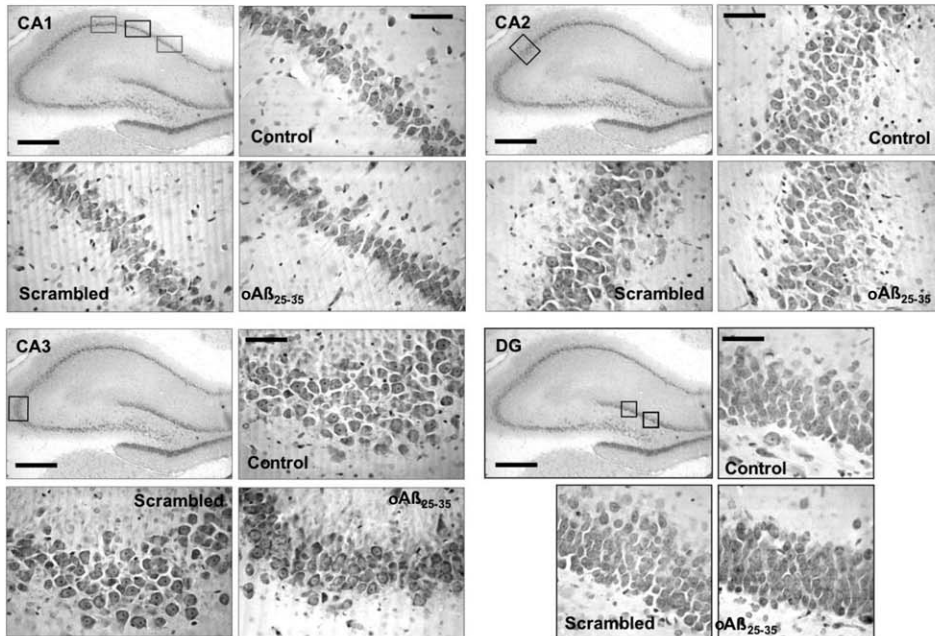

**B.**

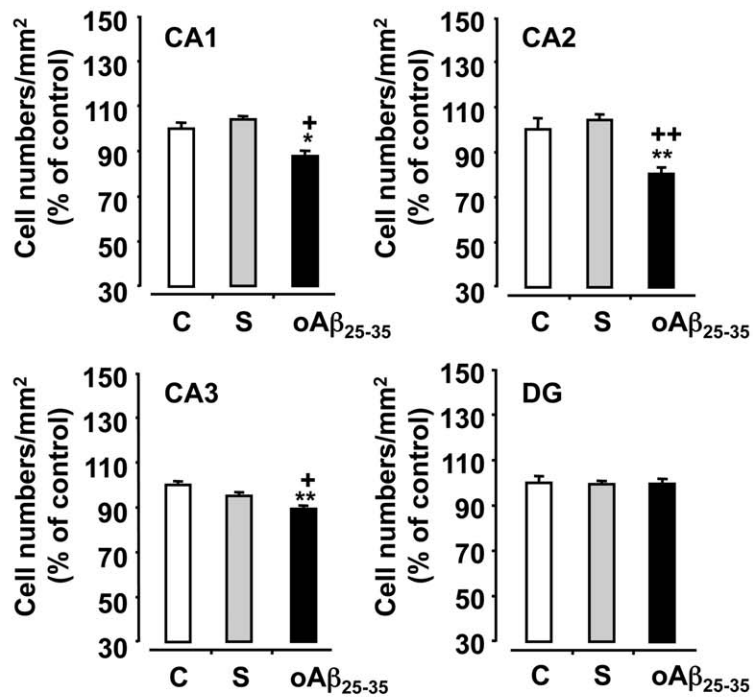

**C.**

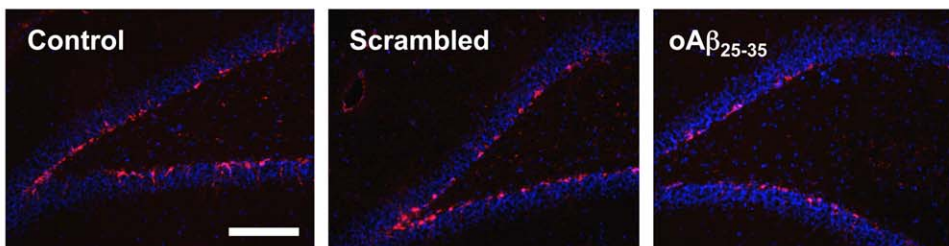

**Figure 11. Hippocampus integrity.** Variations in hippocampus pyramidal cell numbers determined in rats 6 weeks after icv injection of scrambled A $\beta_{25-35}$  peptide (10  $\mu$ g/rat; negative control) or oA $\beta_{25-35}$  (10  $\mu$ g/rat). **A.** Representative microphotographs of coronal sections of Cresyl violet stained hippocampus CA1, CA2, CA3 and DG subfields, obtained in control untreated rats and after scrambled A $\beta_{25-35}$  peptide or oA $\beta_{25-35}$  icv injection. Scale bar = 300 and 100  $\mu$ m. **B.** Average numbers of hippocampus pyramidal cells determined in untreated control rats (C) and 6 weeks after icv injection of scrambled A $\beta_{25-35}$  peptide (10  $\mu$ g/rat; negative control) or oA $\beta_{25-35}$  (10  $\mu$ g/rat). The results are expressed as means  $\pm$  SEM (with  $n = 4$  per group). \* $p < 0.05$  and \*\* $p < 0.01$  vs. control rats, + $p < 0.05$  and ++ $p < 0.01$  vs. respective scrambled peptide-treated rats. **C.** Effects of oA $\beta_{25-35}$  (10  $\mu$ g/rat) icv injection on hippocampus dentate gyrus (DG) neurogenesis using PSA-NCAM immunolabeling determined in untreated control rats and 6 weeks after A $\beta_{25-35}$  scrambled amyloid peptide (10  $\mu$ g/rat; negative control) or oA $\beta_{25-35}$  injection. Neurogenesis was visualized within coronal sections of the DG with Alexafluor555-labeled specific antibody against PSA-NCAM (red immunolabeling), while the nucleus was counterstained with DAPI (blue labeling). Scale bars = 200  $\mu$ m.  
doi:10.1371/journal.pone.0053117.g011

tion was observed after scrambled peptide injection. By contrast, oA $\beta_{25-35}$  injection induced a decrease in stained cells in the CA1 ( $-12\%$ ;  $F_{2,9} = 6.76$ ,  $p < 0.05$ ), CA2 ( $-16\%$ ;  $F_{2,9} = 13.2$ ,  $p < 0.01$ ) and CA3 ( $-10\%$ ;  $F_{2,9} = 14.1$ ,  $p < 0.01$ ) hippocampus subfield, while no modification was observed in the DG ( $F_{2,9} = 0.58$ ,  $p > 0.05$ ), when compared to control and scrambled peptide-injected rats (Fig. 11B).

PSA-NCAM-positive cells, indicative of neurogenesis, were revealed within the DG. An apparent decline in PSA-NCAM immunolabeling was observed 6 weeks after oA $\beta_{25-35}$  injection, while no modification was induced by scrambled peptide icv injection (Fig. 11C).

#### oA $\beta_{25-35}$ Modified APP Processing 6 Weeks after Injection

To determine whether the oA $\beta_{25-35}$  injection impacted APP processing, we measured APP and C99 levels by western blot (Fig. 12). The scrambled peptide injection did not affect APP and C99 levels. By contrast, oA $\beta_{25-35}$  injection provoked a sustained increase in APP levels after 6 weeks in the frontal cortex (Fig. 12A,  $F_{2,22} = 5.95$ ;  $p < 0.01$ ), amygdala (Fig. 12B,  $F_{2,23} = 30.2$ ;  $p < 0.01$ ) and hypothalamus (Fig. 12D,  $F_{2,22} = 7.56$ ;  $p < 0.01$ ), while in the hippocampus A $\beta_{25-35}$  injection induced a significant decrease in APP levels (Fig. 12C,  $F_{2,24} = 13.6$ ;  $p < 0.01$ ). In all structures considered, oA $\beta_{25-35}$  injection provoked a sustained increase in C99 levels, which was significant in the cortex frontal ( $F_{2,25} = 8.52$ ;  $p < 0.01$ ), amygdala ( $F_{2,22} = 31.3$ ;  $p < 0.01$ ) and hippocampus ( $F_{2,22} = 7.53$ ;  $p < 0.01$ ), but not in the hypothalamus ( $F_{2,23} = 2.01$ ;  $p > 0.05$ ). In comparison of all other structures analyzed, in the amygdala the increase of APP and C99 levels observed 6 weeks after the A $\beta_{25-35}$  injection was extremely marked ( $\times 3.8$  and  $\times 2.6$ , respectively) (Fig. 12B).

#### Tau Phosphorylation was also Altered 6 Weeks after oA $\beta_{25-35}$ Injection

To determine whether the oA $\beta_{25-35}$  injection altered after 6 weeks the phosphorylation level of Tau, we measured AT8, AT100 and total Tau levels by western blot. The results were then expressed as phospho-Tau/total Tau ratios (Fig. 13). The scrambled peptide injection did not affect the phosphorylation of AT8 and AT100 epitopes (Fig. 13). By contrast, oA $\beta_{25-35}$  injection provoked a sustained increase of Tau phosphorylation (AT8) in the frontal cortex (Fig. 13A,  $F_{2,20} = 9.24$ ;  $p < 0.01$ ) and amygdala (Fig. 13B,  $F_{2,19} = 61.0$ ;  $p < 0.01$ ). In the hypothalamus (Fig. 13D), no effect was observed ( $F_{2,20} = 0.11$ ;  $p > 0.05$ ). In the hippocampus, a significant decrease was evidenced (Fig. 13C,  $F_{2,23} = 11.0$ ;  $p < 0.01$ ). The AT100 phosphorylation was significantly increased only in the amygdala (Fig. 13B,  $F_{2,21} = 5.84$ ;  $p < 0.01$ ) and hippocampus (Fig. 13D,  $F_{2,22} = 5.33$ ;  $p < 0.01$ ). No modification was observed in the frontal cortex (Fig. 13A,  $F_{2,21} = 0.19$ ;  $p > 0.05$ ) and hypothalamus (Fig. 13C,  $F_{2,21} = 0.23$ ;  $p > 0.05$ ).

## Discussion

### Long-term AD-like Toxicity after oA $\beta_{25-35}$ Peptide Injection in Rats

The main finding of this study is that a single icv injection of oA $\beta_{25-35}$  provoked important physiological, behavioral, biochemical and morphological alterations 6 weeks after injection. The results revealed a clear similarity with numerous relevant signs of the pathology and were in line with the amyloid cascade hypothesis, while also suggesting the possible involvement of soluble oligomeric A $\beta$  fragments in the etiology of AD [3,44].

The long-term effects of oA $\beta_{25-35}$  seemed to be generalized since the peptide injection provoked measurable short- and long-term memory deficits, hypersecretion of glucocorticoids, BDNF deficit in the frontal cortex and amygdala, modification of APP processing and Tau phosphorylation, alteration of ER and mitochondrial homeostasis, apoptosis in the frontal cortex and amygdala, neuroinflammation processes, cholinergic deficits, hippocampal cell loss and an apparent decrease in hippocampal neurogenesis. Inflammation was maintained through astroglial and/or microglial activation in all structures considered. This observation is in accordance with AD hallmarks [45–49], insofar as neuroinflammatory processes were observed in AD patients at all pathological stages, processes which could participate in the amplification of the A $\beta$  peptides-induced toxicity [50–53].

The impact of oA $\beta_{25-35}$  on cholinergic neurons observed at earlier stages [20] was maintained after 6 weeks. VACHT immunoreactivity was decreased in the hippocampus, parietal cortex and basal nuclei of Meynert, but not in the hypothalamus. The cholinergic deficits induced by oA $\beta_{25-35}$  injection therefore seemed consistent with the well-characterized pathological hallmarks described in AD [54,55]. An effect that could be explained in part by the high levels of circulating glucocorticoids evidenced here that was shown to increase A $\beta_{1-42}$  and NMDA-induced neurodegeneration in cholinergic neurons from the nucleus basalis in rat [56].

In the hippocampus, oA $\beta_{25-35}$  icv injection induced cellular loss after 6 weeks, but only in pyramidal cells of all CA regions, while no effect was observed in granular cells of DG. In a prior study, we showed an early cellular loss in the DG [20]. This particular difference between each hippocampus region evidenced over the time deserves a very precise quantification using a stereological approach, but it could be explained in part by neurogenesis modifications between the 3<sup>rd</sup> and 6<sup>th</sup> week following oA $\beta_{25-35}$  injection. PSA-NCAM immunolabeling seems to be more markedly decreased during the first weeks after injection than observed here after 6 weeks. This interesting observation that DG neurogenesis could finally be able to mitigate hippocampus cell loss must be accurately characterized including proliferation, migration and maturation of newborn cells with adequate markers [57], as previously reported between 5 to 30 days by Li and Zuo [58]. In other hippocampal regions, several hypotheses must be

**A. Frontal cortex**

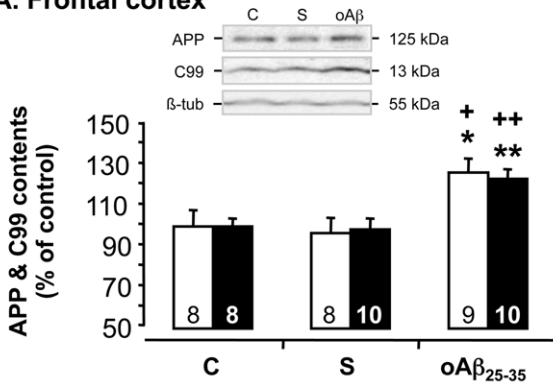

**B. Amygdala**

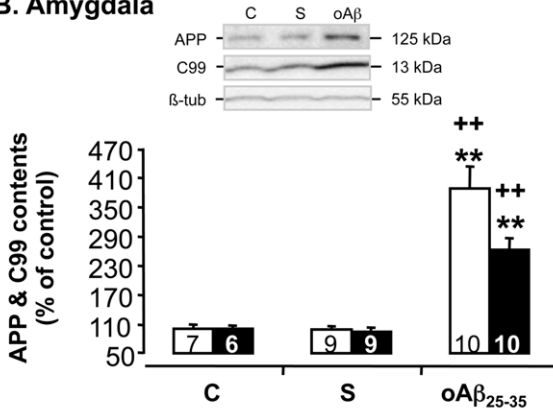

**C. Hippocampus**

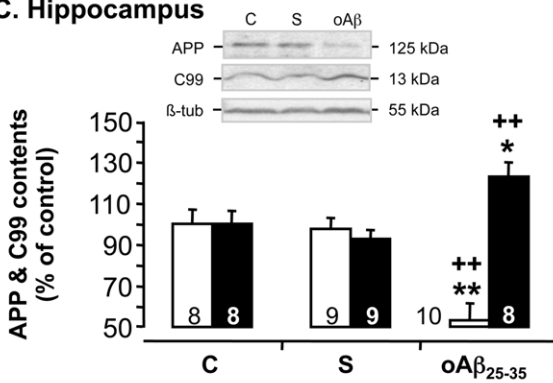

**D. Hypothalamus**

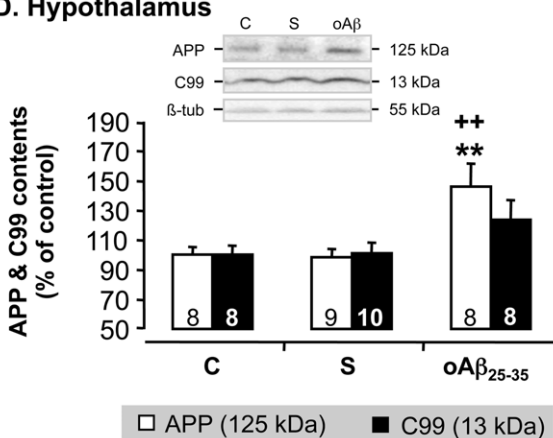

**Figure 12. APP processing.** Effects of oA $\beta_{25-35}$  (10  $\mu$ g/rat) icv injection on APP processing in the frontal cortex, amygdala, hippocampus and hypothalamus, determined by western blot in untreated control rats and 6 weeks after A $\beta_{25-35}$  scrambled amyloid peptide (10  $\mu$ g/rat; negative control) or oA $\beta_{25-35}$  injection. APP (125 kDa) and C99 (13 kDa) variations were normalized with  $\beta$ -tubulin ( $\beta$ -tub, 55 kDa) variations and compared with non-injected rats (control group: C). The results are expressed as means  $\pm$  SEM. \* $p$ <0.05 and \*\* $p$ <0.01 vs. control non-injected rats (control group: C) and + $p$ <0.05 and ++ $p$ <0.01 vs. respective scrambled peptide-treated rats. The number of animals in groups is indicated within the columns. doi:10.1371/journal.pone.0053117.g012

considered. Since glucocorticoids act synergistically with excitatory amino acids, particularly with glutamate [59,60], chronic overstimulation could be extremely toxic [61]. Indeed, a hypersecretion of glucocorticoids is observed 6 weeks after oA $\beta_{25-35}$  injection at levels that could effectively result in a deleterious effect of glucocorticoids. No other data is available at present on the effect of A $\beta$  peptide injection on glucocorticoid regulation. However, several studies demonstrated that glucocorticoids modulated APP processing [62], increased, as previously described, A $\beta_{1-42}$ - and NMDA-induced neurodegeneration in cholinergic neurons from the nucleus basalis in rat [56] and A $\beta_{25-35}$  toxicity in hippocampus neurons [63]. These observations are also coherent with AD symptoms, since a hypersecretion of glucocorticoids was frequently observed in AD patients [64,65].

The hippocampus cell loss is likely the result of apoptotic processes. An increase in pro- and cleaved forms of caspase-9 and -12 was observed in the hippocampus, which reflects mitochondrial and ER stress. However, these increases in initiator caspases were not associated with an activation of the effector caspase, caspase-3. Since initiator caspase-9, which can be induced by caspase-12 [66–68], also activates caspase-6 [69], it is possible that the cell loss in the hippocampus could be in part due to an activation of caspase-6 in this model. As an alternative, necrosis cell death could also be envisaged since, *in vivo*, the complete elimination of apoptotic cells prevents an inflammatory response, whereas necrosis often results in inflammatory reactions [70]. Moreover, in cell culture models, oA $\beta_{25-35}$  was reported to induce apoptosis at lower concentrations (5, 10  $\mu$ mol/l) and necrosis at higher concentrations (20, 40  $\mu$ mol/l) [71]. In the frontal cortex and amygdala, oA $\beta_{25-35}$  injection induced BDNF deficits after 6 weeks. These deficits were in line with previous results, since BDNF deficits were already observed from 2 weeks in the frontal cortex and 3 weeks in the amygdala [20]. In addition, a significant increase in caspases 9, 12 and 3 was observed in these two structures 6 weeks after oA $\beta_{25-35}$  injection. As previously reported in several studies [72–74], BDNF deficits could be associated with a decrease in survival pathways and therefore participate in the initiation of apoptotic processes. The expression of BDNF receptors, TrkB isoforms and p75, and other neurotrophins, particularly nerve growth factor (NGF), must therefore be analyzed to clarify the involvement of trophic factors in the toxic effects induced by oA $\beta_{25-35}$  injection. Consequently, the oA $\beta$ -induced toxicity, notably apoptotic processes, hippocampic cell loss, glucocorticoids increase, BDNF impairment and cholinergic deficits came with and could be considered as responsible for the delayed learning and memory impairments observed in oA $\beta_{25-35}$  treated rats.

It must be noted that the oA $\beta_{25-35}$  effects measured here on various markers led to variations that could appear as not correlated within a particular brain region, particularly at the 6 weeks time-point used in the present study. These often subtle changes are likely due to the particular time-course of the toxicity



**A. Frontal cortex**

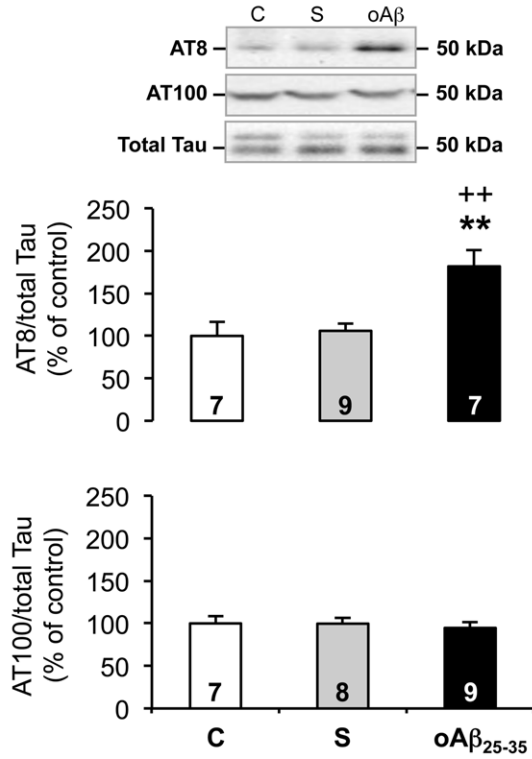

**B. Amygdala**

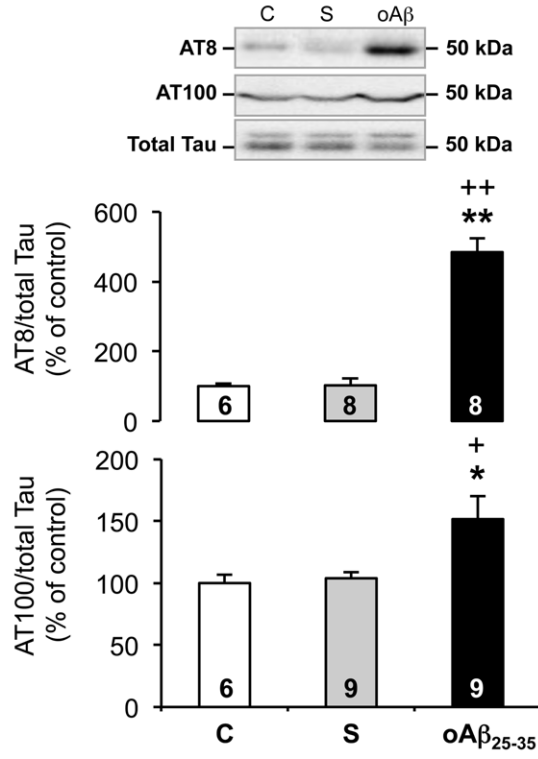

**C. Hippocampus**

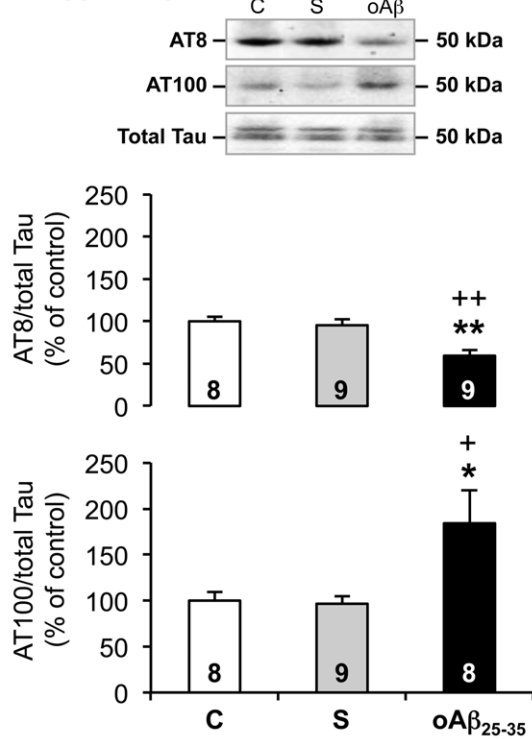

**D. Hypothalamus**

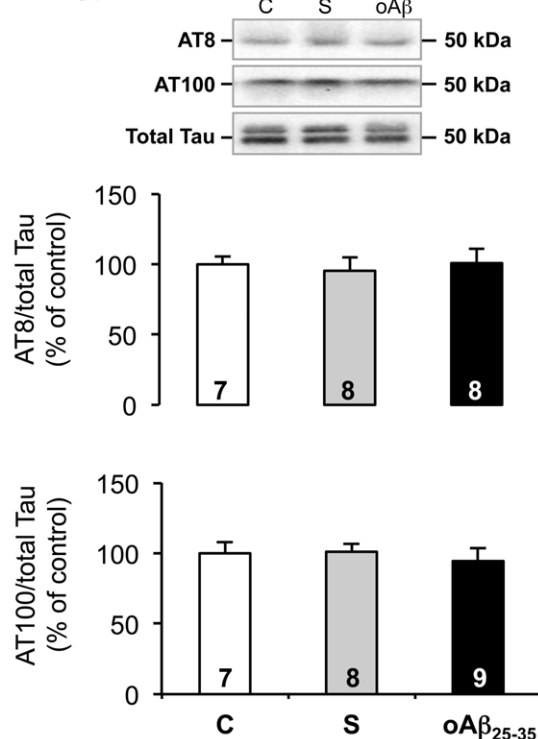

**Figure 13. Tau phosphorylation.** Effects of oA $\beta$ <sub>25-35</sub> (10  $\mu$ g/rat) icv injection on Tau phosphorylation in the frontal cortex, amygdala, hippocampus and hypothalamus, determined by western blot in untreated control rats and 6 weeks after A $\beta$ <sub>25-35</sub> scrambled amyloid peptide (10  $\mu$ g/rat; negative control) or oA $\beta$ <sub>25-35</sub> icv injection. The Tau hyperphosphorylation (AT8; 50 kDa) and the abnormal Tau phosphorylation (AT100; 50 kDa) variations were expressed in function of total Tau expression (50 kDa) and compared with non-injected rats (control group: C). The results are expressed as means  $\pm$  SEM. \*p<0.05 and \*\*p<0.01 vs. control non-injected rats (control group: C) and +p<0.05 and ++p<0.01 vs. respective scrambled peptide-treated rats. The number of animals in groups is indicated within the columns.  
doi:10.1371/journal.pone.0053117.g013

and intrinsic vulnerability of each brain structure, as previously reported at shorter times [20] and as observed in the pathology [75]. For instance, the hippocampus that is precociously damaged after oA $\beta_{25-35}$  [20], shows in the present work, after 6 weeks, some signs of recovery in terms of lipid peroxidation, BDNF levels, or inflammation. In the amygdala, the lipid peroxidation decrease observed 6 weeks after oA $\beta_{25-35}$  was in the continuity and very coherent with the measures made at earlier times in this brain region [20]. Indeed, this apparent sign of recovery could be simply explained by the fact that after the massive and rapid oxidative stress observed during the 1<sup>st</sup> and 2<sup>nd</sup> weeks after icv injection, endogenous neuroprotective mechanisms operate, limiting the extension of lipid peroxidation by increasing activity of the enzymes involved in clearance of peroxidized lipids. Such enzymes include glutathione peroxidase activity that has been recently reported to be modified after A $\beta_{25-35}$  [76,77]. Moreover, while in our previous study the hypothalamus appeared to be relatively insensitive to oA $\beta_{25-35}$  [20], it seemed, here, that the effects induced by the amyloid peptide progressively reached this structure. Indeed, an increase in oxidative stress in the hypothalamus was shown, correlated with an increase in caspase-9 levels. Clearly, oA $\beta_{25-35}$  induced mitochondrial dysfunction in the hypothalamus associated with neuroinflammation processes and an increase of APP level after 6 weeks. However, no effect of oA $\beta_{25-35}$  was observed on hypothalamic cholinergic neurons, Tau phosphorylation, C99 levels and caspase 12 and 3 levels. Likewise, in *post-mortem* studies, amyloid deposits were detected in the hypothalamus in late phases of AD [78]. All A $\beta$  plaques in the hypothalamus were of the Congo red-negative amorphous type [79,80] and comparable to the morphology of amyloid deposits observed in hippocampal and cortical structures more precociously in AD [81]. These observations show that A $\beta$  accumulation in the hypothalamus is a delayed event compared to other structures in AD. In our model, hypothalamus seemed to show, within the time scale used in this study, a similar pattern, since it was necessary to wait 6 weeks to observe the consequences of oA $\beta_{25-35}$  toxicity in this structure. These delayed effects of oA $\beta_{25-35}$  could be partly due to a return of BDNF at basal levels after a sustained increase observed before [20]. As previously discussed, a decrease in BDNF-dependent survival pathways could facilitate oA $\beta_{25-35}$  toxicity in this structure.

### Involvement of Soluble A $\beta$ Short Fragments in the AD Physiopathology

For the first time in this study, we have characterized the particles composition of the aggregated A $\beta_{25-35}$  solution injected icv in rats. Indeed, while in previous study [20] we detailed qualitatively each component of the injected solution, here we showed that the majority of particles (more than 98%) were small soluble particles, suggesting that the toxicity observed after the icv injection of this peptide (oA $\beta_{25-35}$ ) could be due to a mixture of soluble oligomers. However, in a previous study [25], we have showed that the injection of a non-aggregated solution of A $\beta_{25-35}$  induced less toxicity than the aggregated solution, suggesting that bigger particles would be necessary to the toxicity. This hypothesis is reinforced by a previous result using an electronic microscopy approach and showing that bigger particles (amyloid fibrils) seemed to stabilize the smaller soluble particle forms [20].

In addition, the long-lasting presence of oA $\beta_{25-35}$ -HLF tagged peptide in the brain not only showed that such short fragments have *in vivo*, an important lifespan within brain tissues, but also strongly suggested that they could participate in the maintenance of the toxicity as observed here.

Six weeks after oA $\beta_{25-35}$  injection, APP processing, and particularly the amyloidogenic pathway (C99 levels), was increased in the frontal cortex, amygdala and hippocampus. This long-term effect of oA $\beta_{25-35}$  could contribute to the global toxicity always observed after 6 weeks. Interestingly, the increase in C99 level is accompanied with a decrease in APP level in the hippocampus. In the other structures examined, both APP and C99 levels were concomitantly increased. This difference could be due to a specific activation of BACE in the hippocampus, as previously suggested [82], while, in the other structures, oA $\beta_{25-35}$  could only induce an increase in APP expression and processing. Furthermore, as previously discussed [56,62,63], the relation between the high corticosterone levels induced by oA $\beta_{25-35}$  and the activation of amyloidogenic pathway must therefore be further analyzed to clarify the contribution of glucocorticoids deregulation in the amyloid toxicity and more largely in AD etiology.

oA $\beta_{25-35}$  injection also modified Tau phosphorylation. Previous studies showed an increase of Tau phosphorylation up to 3 months after intra-amygdala injection of A $\beta_{25-35}$  or 4 weeks after icv injection [32,83]. In these studies, the authors did not perform the distinction between the different phosphorylation epitopes of Tau. Here, we used two antibodies directed against AT8 and AT100 epitopes, both considered as markers of AD-related Tau phosphorylation [84]. We evidenced clearly a difference of sensitivity to oA $\beta_{25-35}$  among the brain regions considered. An increase of AT8 phosphorylation was noted only at the frontal cortex and amygdala levels, while it was decreased in hippocampus and unchanged in the hypothalamus. Concomitantly, in the same rats, the AT100 phosphorylation was increased in the amygdala and hippocampus and unchanged in the frontal cortex and hypothalamus. In fact, one explanation of these differences of sensitivity to amyloid peptide comes from recent study, where the authors evidenced an intrinsic specific regulation of Tau phosphorylation. Indeed, it seems that Tau phosphorylation occurred in a sequential order of events and that feedback mechanisms exist within neurons where the phosphorylation of certain sites would induce the dephosphorylation of other sites, in order to constantly maintain a phosphorylation level [85]. Thus in our study, it could be suggested that each brain regions could be at a different stage of Tau phosphorylation, and for instance at the hippocampal level that the phosphorylation decrease observed of the AT8 epitope could be under a negative feedback loop exerted by the phosphorylation of the AT100 epitope shown in this structure 6 weeks after oA $\beta_{25-35}$  injection.

There is no doubt that progressive A $\beta$  accumulation contributes to the AD pathology and that extracellular amyloid deposits are a hallmark of AD. However, the view that the mature amyloid fibril was the only toxic species of A $\beta$  is now challenged. Indeed, experimental studies have shown for a range of peptides and proteins that amyloid fibril formation is preceded by the appearance of organized molecular assemblies, usually termed protofibrils [86]. In addition, detailed biophysical studies are currently identifying the formation of smaller oligomeric species at earlier stages of the aggregation process, *in vitro*, in animal models and in patient brains. In fact, it appears highly conceivable that amyloid deposits may only be one aspect of a larger pathological cascade and indirect consequences of protective responses geared towards sequestering toxic soluble A $\beta$  molecules within plaques, from which oligomeric toxic fragments could be released by proteolysis [4,9,10,87]. The peculiar potent aggregative ability and neurotoxicity of oA $\beta_{25-35}$ , its capability to induce *de novo* the A $\beta_{1-40/42}$  protein synthesis and the abnormal phosphorylation of Tau, now even discovered physiologically to be present in elderly people

[14–16], reinforce its potential involvement in the pathogenesis of AD.

In summary, we showed that a single icv oA $\beta_{25-35}$  injection resulted in long-term biochemical, morphological and behavioral alterations, suggesting a progressive evolution of oA $\beta_{25-35}$  deleterious effects and reinforced the face validity to this non-transgenic model of AD. This study also provided further insight on the pathological role of oligomeric A $\beta$  fragments with a higher  $\beta$ -sheet potential [12–16,18,20], which could have been largely underestimated, as recently reviewed [87]. Remarkably, this fragment resulting from A $\beta_{1-40}$  and A $\beta_{1-42}$  proteolysis appears extremely toxic, with an important lifespan in brain tissues and could significantly contribute to the overall toxicity and therefore to the maintenance of the progressive neurodegeneration processes

## References

- Mattson MP (2004) Pathways towards and away from Alzheimer's disease. *Nature* 430: 631–639.
- Selkoe DJ (2001) Alzheimer's disease: Genes, proteins, and therapy. *Physiol Rev* 81: 741–766.
- Haass C, Selkoe DJ (2007) Soluble protein oligomers in neurodegeneration: Lessons from the Alzheimer's amyloid  $\beta$ -peptide. *Nat Rev Mol Cell Biol* 8: 101–112.
- Watson D, Castano E, Kokjohn TA, Kuo YM, Lyubchenko Y, et al. (2005) Physicochemical characteristics of soluble oligomeric A $\beta$  and their pathologic role in Alzheimer's disease. *Neurol Res* 27: 869–881.
- Holcomb L, Gordon MN, McGowan E, Yu X, Benkovic S, et al. (1998) Accelerated Alzheimer-type phenotype in transgenic mice carrying both mutant amyloid precursor protein and presenilin 1 transgenes. *Nat Med* 4: 97–100.
- Cleary JP, Walsh DM, Hofmeister JJ, Shankar GM, Kuskowski MA, et al. (2005) Natural oligomers of the amyloid- $\beta$  protein specifically disrupt cognitive function. *Nat Neurosci* 8: 79–84.
- Klyubin I, Walsh DM, Lemere CA, Cullen WK, Shankar GM, et al. (2005) Amyloid- $\beta$  protein immunotherapy neutralizes A $\beta$  oligomers that disrupt synaptic plasticity *in vivo*. *Nat Med* 11: 556–561.
- Lambert MP, Barlow AK, Chromy BA, Edwards C, Freed R, et al. (1998) Diffusible, nonfibrillar ligands derived from A $\beta_{1-42}$  are potent central nervous system neurotoxins. *Proc Natl Acad Sci USA* 95: 6448–6453.
- Ferreira ST, Vieira MN, De Felice FG (2007) Soluble protein oligomers as emerging toxins in Alzheimer's and other amyloid diseases. *IUBMB Life* 59: 332–345.
- Walsh DM, Selkoe DJ (2007) A $\beta$  oligomers - A decade of discovery. *J Neurochem* 101: 1172–1184.
- Glennier GG, Wong CW (1984) Alzheimer's disease: Initial report of the purification and characterization of a novel cerebrovascular amyloid protein. *Biochem Biophys Res Commun* 120: 885–890.
- Russo C, Schettini G, Saido TC, Hulette C, Lipka C, et al. (2000) Presenilin-1 mutations in Alzheimer's disease. *Nature* 405: 531–532.
- Tekirian TL (2001) Commentary: A $\beta$  N-terminal isoforms: Critical contributors in the course of Alzheimer's disease pathophysiology. *J Alzheimers Dis* 3: 241–248.
- Gruden MA, Davidova TB, Malisaukas M, Sewell RD, Voskresenskaya NI, et al. (2007) Differential neuroimmune markers to the onset of Alzheimer's disease neurodegeneration and dementia: Autoantibodies to A $\beta_{25-35}$  oligomers, S100b and neurotransmitters. *J Neuroimmunol* 186: 181–192.
- Kaneko I, Morimoto K, Kubo T (2001) Drastic neuronal loss in vivo by  $\beta$ -amyloid racemized at Ser(26) residue: Conversion of non-toxic [D-Ser(26)]A $\beta_{1-40}$  to toxic and proteinase-resistant fragments. *Neuroscience* 104: 1003–1011.
- Kubo T, Nishimura S, Kumagai Y, Kaneko I (2002) *In vivo* conversion of racemized  $\beta$ -amyloid ([D-Ser 26]A $\beta_{1-40}$ ) to truncated and toxic fragments ([D-Ser 26] A $\beta_{25-35/40}$ ) and fragment presence in the brains of Alzheimer's patients. *J Neurosci Res* 70: 474–483.
- Pike CJ, Burdick D, Walencewicz AJ, Glabe CG, Cotman CW (1993) Neurodegeneration induced by  $\beta$ -amyloid peptides in vitro: The role of peptide assembly state. *J Neurosci* 13: 1676–1687.
- Pike CJ, Walencewicz-Wasserman AJ, Kosmoski J, Cribbs DH, Glabe CG, et al. (1995) Structure-activity analyses of  $\beta$ -amyloid peptides: Contributions of the  $\beta$  25–35 region to aggregation and neurotoxicity. *J Neurochem* 64: 253–265.
- Yankner BA, Duffy LK, Kirschner DA (1990) Neurotrophic and neurotoxic effects of amyloid- $\beta$  protein: Reversal by tachykinin neuropeptides. *Science* 250: 279–282.
- Zussy C, Brureau A, Delair B, Marchal S, Keller E, et al. (2011) Time-course and regional analyses of the physiopathological changes induced after cerebral injection of an amyloid- $\beta$  fragment in rats. *Amer J Pathol* 179: 315–334.
- Yamada K, Nabeshima T (2000) Animal models of Alzheimer's disease and evaluation of anti-dementia drugs. *Pharmacol Ther* 88: 93–113.
- Varadarajan S, Kanski J, Aksenova M, Lauderback C, Butterfield DA (2001) Different mechanisms of oxidative stress and neurotoxicity for Alzheimer's A $\beta_{1-42}$  and A $\beta_{25-35}$ . *J Am Chem Soc* 123: 5625–5631.
- Arancibia S, Silhol M, Moulère F, Meffre J, Höllinger I, et al. (2008) Protective effect of BDNF against beta-amyloid induced neurotoxicity in vitro and in vivo in rats. *Neurobiol Dis* 31: 316–326.
- Alkam T, Nitta A, Mizoguchi H, Itoh A, Murai R, et al. (2008) The extensive nitration of neurofilament light chain in the hippocampus is associated with the cognitive impairment induced by amyloid- $\beta$  in mice. *J Pharmacol Exp Ther* 327: 137–147.
- Delobette S, Privat A, Maurice T (1997) *In vitro* aggregation facilitates  $\beta$ -amyloid peptide-(25–35)-induced amnesia in the rat. *Eur J Pharmacol* 319: 1–4.
- Maurice T, Lockhart BP, Privat A (1996) Amnesia induced in mice by centrally administered  $\beta$ -amyloid peptides involves cholinergic dysfunction. *Brain Res* 706: 181–193.
- Maurice T, Lockhart BP, Su TP, Privat A (1996) Reversion of  $\beta$ -25–35-amyloid peptide-induced amnesia by NMDA receptor-associated glycine site agonists. *Brain Res* 731: 249–253.
- Meunier J, Ieni J, Maurice T (2006) The anti-amnesic and neuroprotective effects of donepezil against amyloid- $\beta$  (25–35) peptide-induced toxicity in mice involve an interaction with the sigma(1) receptor. *Br J Pharmacol* 149: 998–1012.
- Stepanichev MY, Zdobnova IM, Yakovlev AA, Onufriev MV, Lazareva NA, et al. (2003) Effects of Tumor necrosis factor- $\alpha$  central administration on hippocampal damage in rat induced by amyloid  $\beta$ -peptide (25–35). *J Neurosci Res* 71: 110–120.
- Villard V, Espallergues J, Keller E, Alkam T, Nitta A, et al. (2009) Antiamnesic and neuroprotective effects of the aminotetrahydrofuran derivative Anavex1–41 against amyloid- $\beta_{25-35}$ -induced toxicity in mice. *Neuropsychopharmacology* 34: 1552–1566.
- Yamaguchi Y, Kawashima S (2001) Effects of amyloid- $\beta$  (25–35) on passive avoidance, radial-arm maze learning and choline acetyltransferase activity in the rat. *Eur J Pharmacol* 412: 265–272.
- Klementiev B, Novikova T, Novitskaya V, Walmod PS, Dmytriyeva O, et al. (2007) A neural cell adhesion molecule-derived peptide reduces neuropathological signs and cognitive impairment induced by A $\beta_{25-35}$ . *Neuroscience* 145: 209–224.
- Chavant F, Deguil J, Pain S, Ingrand I, Milin S, et al. (2009) Imipramine, in part through tumor necrosis factor inhibition, prevents cognitive decline and  $\beta$ -amyloid accumulation in a mouse model of Alzheimer's Disease. *J Pharmacol Exp Ther* 332: 505–514.
- Stepanichev MY, Moiseeva YV, Lazareva NA, Onufriev MV, Gulyaeva NV (2003) Single intracerebroventricular administration of amyloid- $\beta_{25-35}$  peptide induces impairment in short-term rather than long-term memory in rats. *Brain Res Bull* 61: 197–205.
- Paxinos G, Watson C (1997) The rat brain in stereotaxic coordinates. 3<sup>rd</sup> ed., Academic Press, San Diego.
- Meunier J, Gue M, Recasens M, Maurice T (2004) Attenuation by a sigma1 receptor agonist of the learning and memory deficits induced by a prenatal restraint stress in juvenile rats. *Br J Pharmacol* 142: 689–700.
- Givalois L, Naert G, Rage F, Ixart G, Arancibia S, et al. (2004) A single brain-derived neurotrophic factor injection modifies hypothalamo-pituitary-adrenocortical axis activity in adult male rats. *Mol Cell Neurosci* 27: 280–295.
- Hermes-Lima M, Willmore WG, Storey KB (1995) Quantification of lipid peroxidation in tissue extracts based on Fe(III)-xylene orange complex formation. *Free Radic Biol Med* 19: 271–280.
- Cotrufo T, Viegi A, Berardi N, Bozzi Y, Mascia L, et al. (2003) Effects of neurotrophins on synaptic protein expression in the visual cortex of dark-reared rats. *J Neurosci* 23: 3566–3571.
- Givalois L, Arancibia S, Alonso G, Tapia-Arancibia L (2004) Expression of BDNF and its receptors in the median eminence cells with sensitivity to stress. *Endocrinology* 135: 4737–4747.

observed in AD, through particularly an inhibition of BDNF, an increase of apoptotic processes, a glucocorticoid hypersecretion, and the induction of the amyloid pathway and abnormal phosphorylation of Tau.

## Acknowledgments

The authors are thankful to E. Savary for assistance in data collection.

## Author Contributions

Conceived and designed the experiments: LG TM GI. Performed the experiments: CZ AB EK SM CB BD LG. Analyzed the data: LG TM. Wrote the paper: LG TM.

41. Naert G, Ixart G, Tapia-Arancibia L, Givalois L (2006) Continuous icv infusion of brain-derived neurotrophic factor modifies hypothalamic-pituitary-adrenal axis activity, locomotor activity and body temperature rhythms in adult male rats. *Neuroscience* 139: 779–789.
42. Stepanichev MY, Zdobnova IM, Zarubenko II, Lazareva NA, Gulyaeva NV (2006) Studies of the effects of central administration of  $\beta$ -amyloid peptide (25–35): pathomorphological changes in the Hippocampus and impairment of spatial memory. *Neurosci Behav Physiol* 36: 101–106.
43. Stepanichev MY, Zdobnova IM, Zarubenko II, Moiseeva YV, Lazareva NA, et al. (2004) Amyloid- $\beta$ (25–35)-induced memory impairments correlate with cell loss in rat hippocampus. *Physiol Behav* 80: 647–655.
44. Walsh DM, Klyubin I, Shankar GM, Townsend M, Fadeeva JV, et al. (2005) The role of cell-derived oligomers of  $\beta$  in Alzheimer's disease and avenues for therapeutic intervention. *Biochem Soc Trans* 33: 1087–1090.
45. Korolainen MA, Auriola S, Nyman TA, Alafuzoff I, Pirttila T (2005) Proteomic analysis of glial fibrillary acidic protein in Alzheimer's disease and aging brain. *Neurobiol Dis* 20: 858–870.
46. McGeer PL, Itagaki S, Tago H, McGeer EG (1987) Reactive microglia in patients with senile dementia of the Alzheimer type are positive for the histocompatibility glycoprotein HLA-DR. *Neurosci Lett* 79: 195–200.
47. Rogers J, Luber-Narod J, Styren SD, Civin WH (1988) The inflammatory response in Alzheimer's disease. *Neurobiol Aging* 9: 339–349.
48. Rozemuller JM, Eikelenboom P, Pals ST, Stam FC (1989) Microglial cells around amyloid plaques in Alzheimer's disease express leucocyte adhesion molecules of the I $\beta$ -1 family. *Neurosci Lett* 101: 288–292.
49. Vanzani MC, Iacono RF, Caccuri RL, Berria MI (2005) Immunohistochemical and morphometric features of astrocyte reactivity vs. plaque location in Alzheimer's disease. *Medicina (B. Aires)* 65: 213–218.
50. Eikelenboom P, Veerhuis R, Scheper W, Rozemuller AJM, van Gool WA, et al. (2006) The significance of neuroinflammation in understanding Alzheimer's disease. *J Neur Trans* 113: 1685–1695.
51. Nagele RG, Wegiel J, Venkataraman V, Imaki H, Wang KC (2004) Contribution of glial cells to the development of amyloid plaques in Alzheimer's disease. *Neurobiol Aging* 25: 663–674.
52. Rogers J (2008) The inflammatory response in Alzheimer's disease. *J Periodontol* 79: 1535–1543.
53. Rojo LE, Fernandez JA, Maccioni AA, Jimenez JM, Maccioni RB (2008) Neuroinflammation: Implications for the pathogenesis and molecular diagnosis of Alzheimer's disease. *Arch Med Res* 39: 1–16.
54. Blennow K, de Leon MJ, Zetterberg H (2006) Alzheimer's disease. *Lancet* 368: 387–403.
55. Jakob-Roetne R, Jacobsen H (2009) Alzheimer's disease: From pathology to therapeutic approaches. *Angew Chem Int Ed Engl* 48: 3030–3059.
56. Abraham I, Harkany T, Horvath KM, Veenema AH, Penke B, et al. (2000) Chronic corticosterone administration dose-dependently modulates  $\beta$ (1–42)- and NMDA-induced neurodegeneration in rat magnocellular nucleus basalis. *J Neuroendocrinol* 12: 486–494.
57. Von Bohlen Und Halbach O (2007) Immunohistological markers for staging neurogenesis in adult hippocampus. *Cell Tissue Res* 329: 409–420.
58. Li X, Zuo P (2005) Effects of  $\beta$ (25–35) on neurogenesis in the adult mouse subventricular zone and dentate gyrus. *Neuro Res* 27: 218–222.
59. Krugers HJ, Koolhaas JM, Bohus B, Korf J (1993) A single social stress-experience alters glutamate receptor-binding in rat hippocampal CA3 area. *Neurosci Lett* 154: 73–77.
60. Lowy MT, Gault L, Yamamoto BK (1993) Adrenalectomy attenuates stress-induced elevations in extracellular glutamate concentration in the hippocampus. *J Neurochem* 61: 1957–1960.
61. McEwen BS (2008) Central effects of stress hormones in health and disease: Understanding the protective and damaging effects of stress and stress mediators. *Eur J Pharmacol* 583: 174–185.
62. Catania C, Sotiropoulos I, Silva R, Onofri C, Breen KC, et al. (2007) The amyloidogenic potential and behavioral correlates of stress. *Mol Psychiatry* 14: 95–105.
63. Goodman Y, Bruce AJ, Cheng B, Mattson MP (1996) Estrogens attenuate and corticosterone exacerbates excitotoxicity, oxidative injury, and amyloid  $\beta$ -peptide toxicity in hippocampal neurons. *J Neurochem* 66: 1836–1844.
64. Davis KL, Davis BM, Greenwald BS, Mohs RC, Mathe AA, et al. (1986) Cortisol and Alzheimer's disease, I: Basal studies. *Am J Psy* 143: 300–305.
65. Masugi F, Ogihara T, Sakaguchi K, Otsuka A, Tsuchiya Y, et al. (1989) High plasma levels of cortisol in patients with senile dementia of the Alzheimer's type. *Methods Find Exp Clin Pharmacol* 11: 707–710.
66. Breckenridge DG, Germain M, Mathai JP, Nguyen M, Shore GC (2003) Regulation of apoptosis by endoplasmic reticulum pathways. *Oncogene* 22: 8608–8618.
67. Morishima N, Nakanishi K, Takenouchi H, Shibata T, Yasuhiko Y (2002) An endoplasmic reticulum stress-specific caspase cascade in apoptosis. Cytochrome c-independent activation of caspase-9 by caspase-12. *J Biol Chem* 277: 34287–34294.
68. Rao RV, Castro-Obregon S, Frankowski H, Schuler M, Stoka V, et al. (2002) Coupling endoplasmic reticulum stress to the cell death program. An Apaf-1-independent intrinsic pathway. *J Biol Chem* 277: 21836–21842.
69. Pop C, Salvesen GS (2009) Human caspases: Activation, specificity, and regulation. *J Biol Chem* 284: 21777–21781.
70. Sutton ET, Hellermann GR, Thomas T (1997)  $\beta$ -amyloid-induced endothelial necrosis and inhibition of nitric oxide production. *Exp Cell Res* 230: 368–376.
71. Geci C, How J, Alturaihi H, Kumar U (2007)  $\beta$ -amyloid increases somatostatin expression in cultured cortical neurons. *J Neurochem* 101: 664–673.
72. Bazan-Peregrino M, Gutierrez-Kobeh L, Moran J (2007) Role of brain-derived neurotrophic factor in the protective action of N-methyl-D-aspartate in the apoptotic death of cerebellar granule neurons induced by low potassium. *J Neurosci Res* 85: 332–341.
73. Nguyen N, Lee SB, Lee YS, Lee KH, Ahn JY (2009) Neuroprotection by NGF and BDNF against neurotoxin-exerted apoptotic death in neural stem cells are mediated through Trk receptors, activating PI3-kinase and MAPK pathways. *Neurochem Res* 34: 942–951.
74. Wang R, Li YB, Li YH, Xu Y, Wu HL, et al. (2008) Curcumin protects against glutamate excitotoxicity in rat cerebral cortical neurons by increasing brain-derived neurotrophic factor level and activating TrkB. *Brain Res* 1210: 84–91.
75. Braak H, Braak E (1991) Neuropathological staging of Alzheimer-related changes. *Acta Neuropathol* 82: 239–259.
76. Khan A, Vaibhav K, Javed H, Khan MM, Tabassum R, et al. (2012) Attenuation of  $\beta$ -induced neurotoxicity by thymoquinone via inhibition of mitochondrial dysfunction and oxidative stress. *Mol Cell Biochem* 369: 55–65.
77. Lin F, Xie B, Cai F, Wu G (2012) Protective effect of Puerarin on  $\beta$ -amyloid-induced neurotoxicity in rat hippocampal neurons. *Arzneimittelforschung* 62: 187–193.
78. Thal DR, Rub UM, Orantes MM, Braak HM (2002) Phases of  $\beta$ -deposition in the human brain and its relevance for the development of Alzheimer's disease. *Neurology* 58: 1791–1800.
79. Van de Nes J, Konermann S, Nafe R, Swaab D (2006)  $\beta$ -protein/a4 deposits are not associated with hyperphosphorylated Tau in somatostatin neurons in the hypothalamus of Alzheimer's disease patients. *Acta Neuropathol* 111: 126–138.
80. Van de Nes JA, Kamphorst W, Ravid R, Swaab DF (1998) Comparison of  $\beta$ -protein/a4 deposits and Alz-50-stained cytoskeletal changes in the hypothalamus and adjoining areas of Alzheimer's disease patients: Amorphic plaques and cytoskeletal changes occur independently. *Acta Neuropathol* 96: 129–138.
81. Standaert DG, Lee VM, Greenberg BD, Lowery DE, Trojanowski JQ (1991) Molecular features of hypothalamic plaques in Alzheimer's disease. *Am J Pathol* 139: 681–691.
82. Lin HB, Yang XM, Li TJ, Cheng YF, Zhang HT, et al. (2009) Memory deficits and neurochemical changes induced by C-reactive protein in rats: implication in Alzheimer's disease. *Psychopharmacol* 204: 705–714.
83. Sigurdsson EM, Lee JM, Dong XW, Hejna MJ, Lorens SA (1997) Bilateral injections of amyloid-beta 25–35 into the amygdala of young Fischer rats: behavioral, neurochemical, and time dependent histopathological effects. *Neurobiol Aging* 18: 591–608.
84. Schindowski K, Bretteville A, Leroy K, Bégard S, Brion JP, et al. (2006) Alzheimer's disease-like Tau neuropathology leads to memory deficits and loss of functional synapses in a novel mutated tau transgenic mouse without any motor deficits. *Amer J Pathol* 169: 599–616.
85. Bertrand J, Plouffe V, Sénéchal P, Leclerc N (2010) The pattern of human Tau phosphorylation is the result of priming and feedback events in primary hippocampal neurons. *Neuroscience* 168: 323–334.
86. Hartley DM, Walsh DM, Yc CP, Diehl T, Vasquez S, et al. (1999) Protofibrillar intermediates of amyloid beta-protein induce acute electrophysiological changes and progressive neurotoxicity in cortical neurons. *J Neurosci* 19: 8876–8884.
87. Millucci L, Ghezzi L, Bernardini G, Santucci A (2010) Conformations and biological activities of amyloid beta peptide 25–35. *Curr Protein Pept Sc* 11: 54–67.
